# Supplementary material for: Robot-assisted surgery in a broader healthcare perspective: a difference-in-difference-based cost analysis of a national prostatectomy cohort
Source: PubMed Central journal article supplement — BMJ Open. 2017 Jul 21;7(7):e015580. doi: 10.1136/bmjopen-2016-015580 (PMC5642660; doi:10.1136/bmjopen-2016-015580), 2017-07-21
Supplement: bmjopen-2016-015580.draft_revisions.pdf [file bmjopen-2016-015580.draft_revisions.pdf]

# BMJ Open

## Robot-assisted surgery in a broader health care perspective: A difference-in-difference-based cost analysis of a national cohort undergoing prostatectomy

|                                 |                                                                                                                                                                                                                                                                                                                                                        |
|---------------------------------|--------------------------------------------------------------------------------------------------------------------------------------------------------------------------------------------------------------------------------------------------------------------------------------------------------------------------------------------------------|
| Journal:                        | <i>BMJ Open</i>                                                                                                                                                                                                                                                                                                                                        |
| Manuscript ID                   | bmjopen-2016-015580                                                                                                                                                                                                                                                                                                                                    |
| Article Type:                   | Research                                                                                                                                                                                                                                                                                                                                               |
| Date Submitted by the Author:   | 14-Dec-2016                                                                                                                                                                                                                                                                                                                                            |
| Complete List of Authors:       | Hyldgård, Vibe; Aarhus Universitet, Public Health; DEFACTUM, Health Economics<br>Laursen, Karin; Aarhus Universitet, Department of Public Health<br>Poulsen, Johan; Aalborg University Hospital; Department of Urology, King's College Hospital<br>Søgaard, Rikke; Aarhus Universitet, Department of Public Health and Department of Clinical Medicine |
| <b>Primary Subject Heading</b>: | Health economics                                                                                                                                                                                                                                                                                                                                       |
| Secondary Subject Heading:      | Urology                                                                                                                                                                                                                                                                                                                                                |
| Keywords:                       | HEALTH ECONOMICS, Prostate cancer, Robotics and Laparoscopy, Robot-assisted surgery, Cost analysis, Prostatectomy                                                                                                                                                                                                                                      |
|                                 |                                                                                                                                                                                                                                                                                                                                                        |

SCHOLARONE™  
Manuscripts

1  
2  
3  
4  
5  
6  
7  
8  
9  
10  
11 Robot-assisted surgery in a broader health care  
12 perspective: A difference-in-difference-based  
13 cost analysis of a national cohort undergoing  
14 prostatectomy  
15  
16  
17  
18  
19  
20  
21  
22  
23  
24  
25  
26  
27

28 Vibe Bolvig Hyldgård<sup>a,b</sup> (VBH), vibe.bolvig@ph.au.dk

29 Karin Rosenkilde Laursen<sup>b</sup> (KRL), krl@ph.au.dk

30 Johan Poulsen<sup>c,d</sup> (JP), jop@rn.dk

31 Rikke Søgaard<sup>b,e</sup> (RS), rs@ph.au.dk  
32  
33  
34

35 <sup>a</sup> Health Economics, DEFACTUM, Central Denmark Region, DK

36 <sup>b</sup> Department of Public Health, Aarhus University, DK

37 <sup>c</sup> Aalborg University Hospital, DK

38 <sup>d</sup> Department of Urology, King's College Hospital, London, UK

39 <sup>e</sup> Department of Clinical Medicine, Aarhus University, DK  
40  
41  
42  
43  
44  
45  
46  
47  
48  
49  
50  
51  
52  
53  
54  
55  
56  
57  
58  
59  
60

Corresponding author: Vibe Bolvig Hyldgård  
Address: Olof Palmes Allé 15, 8200 Aarhus N, DK  
Email: vibe.bolvig@rn.dk / Fax: 78414029  
Phone: +45 31191504

## Abstract

**Objective:** To estimate costs attributable to robot-assisted laparoscopic prostatectomy (RALP) as compared to open (OP) and laparoscopic (LP) prostatectomies in a national health-service perspective.

**Patients and methods:** Register-based study of 4309 consecutive patients who underwent prostatectomy from 2006 to 2013 (2241 RALP, 1818 OP and 250 LP). Patients were followed from 12 months before to 12 months after prostatectomy with respect to service use in primary care (general practitioners, therapists, specialists etc.) and hospitals (in- and outpatient activity related to prostatectomy and comorbidity). Tariffs of the activity-based remuneration system for primary care and the Diagnosis-Related Grouping case-mix system for hospital-based care were used to value service use. Costs attributable to RALP were estimated using a difference-in-difference analytical approach and adjusted for patient- and hospital-level risk selection using multilevel regression.

**Results:** No significant effect of RALP on resource-use was observed except for a marginally lower use of primary care and fewer bed days as compared with OP (not LP). The overall cost consequence of RALP was estimated at an additional €2459 (95% CI, 1377 – 3540) as compared with OP and an additional €3860 (95% CI, 559 – 7160) as compared with LP, mainly due to higher cost intensity during the index admissions.

**Conclusions:** No support for the argument of the additional costs of using robots for prostatectomy being outweighed by cost savings during a longer-term follow up and in a broader health care perspective was found. The policy interpretation is that the use of robots for prostatectomy should be driven by clinical superiority and that formal effectiveness analysis is required to determine whether the current and eventual new purchasing of robot capacity is best used for prostatectomy.

1  
2  
3 **Keywords:** Cost analysis; Economics; Prostate cancer; Prostatectomy; Robot-assisted  
4 surgery; Robotics and Laparoscopy  
5  
6  
7  
8

### 9 **Strengths and limitations of this study**

10 The wide health care sector scope and the follow-up-period of 12 months are important  
11 strengths of this study and separate it from others.  
12  
13

14 The difference in difference design also represents a clear strength as it minimizes the effect  
15 of selection bias, especially in combination with the used multilevel regression analysis.  
16  
17

18 An additional strength is the use of high quality register-data, which was further validated in  
19 connection with this study.  
20  
21

22 The main weakness of this study lies in the premises of basing it on registry data, where  
23 severity and other clinically relevant details – such as BMI – are not routinely recorded.  
24  
25

26 A proportion of patients had missing values regarding cancer stage but these patients did not  
27 seem to be different from patients with complete data.  
28  
29  
30  
31  
32  
33  
34  
35  
36  
37  
38  
39  
40  
41  
42  
43  
44  
45  
46  
47  
48  
49  
50  
51  
52  
53  
54  
55  
56  
57  
58  
59  
60

## 1. Introduction

The most common cancer among men older than 50 years is prostate cancer.[1] The incidence has increased notably since the diagnostic prostate-specific antigen test was introduced and, in accordance, the incidence of prostatectomy has increased rapidly.[1–3] Internationally, the transition from open prostatectomy (OP) to laparoscopic prostatectomy (LP) was much slower than the on-going transition from LP to robot-assisted laparoscopic prostatectomy (RALP), which is today the most frequently used technique in North America and in some parts of Europe.[4] As a consequence of the rapid dissemination of RALP, the literature comparing RALP to LP is scarce.

The minimally invasive methods LP and RALP have been found to hold some peri-operational advantages over OP such as less bleeding and fewer complications of e.g. urinary incontinence.[1,5–8] The literature is, however, not definite in terms of whether these benefits of the minimally invasive approaches can be achieved equally with or without robot support.[2,4,9] It has been argued that robot technology has a particular advantage in obese patients but, again, this has been questioned by a recent study demonstrating similar oncological and pathological outcomes when comparing RALP to LP and OP in obese patients.[10]

In comparison with not using robot support, the use of robot support leads to significantly higher costs due to the capital binding in the robot, maintenance costs and surgical supplies.[4,11,12] However, there could be cost savings in the longer term and in a broader health care sector perspective that outweighs the additional cost of the surgical procedure.

These could flow from the better process outcomes such as less bleeding and fewer bed days. Despite the obvious relevance of a broader perspective, the literature is characterised by focussing solely on admission costs or just operating costs. The overall consequences of the

1  
2  
3 dissemination of the robot technology to health care costs are therefore to a large extent  
4  
5 uncertain. The objective of this study is to estimate the costs attributable to RALP as  
6  
7 compared to OP and LP in a broad health care sector perspective and using a time horizon  
8  
9 that allows for clinical manifestation of the postoperative advantages of robot support.  
10  
11

## 12 13 14 15 16 **2. Patients and methods**

### 17 18 19 20 21 **2.1. Study-design**

22  
23 A national-scale cohort study following patients from one year before to one year after  
24  
25 prostatectomy. Data was collected in connection with a Danish health technology assessment  
26  
27 (HTA) of robot-assisted surgery, which this study is a further development of.[13]  
28  
29

### 30 31 32 **2.2. Study population**

33  
34 Consecutive men who underwent prostatectomy in Denmark in the period January 1<sup>st</sup> 2006 to  
35  
36 august 1<sup>st</sup> 2013 were identified from the National Patient Registry,[14] using the procedural  
37  
38 codes KKEC00, KKEC00A, KKEC00B, KKEC00C, KKEC01, KKEC01A, KKEC01B,  
39  
40 KKEC01C, KZXX00 and ZPW00002. To enhance comparability of the patients an inclusion  
41  
42 criterion was that the robot-assisted technique should be available at the given hospital at the  
43  
44 time of the prostatectomy.  
45  
46  
47  
48

### 49 50 51 **2.3. Data sources**

52  
53 Individual-level register data were extracted from national administrative registries including  
54  
55 The Danish National Patient Register,[14] The Danish Civil Registration System,[15] and The  
56  
57 Danish National Health Service Register.[16] Costs were drawn from the registries for the  
58  
59  
60

1  
2  
3 diagnose related grouping system (DRG) and the Danish outpatient grouping system  
4  
5 (DAGS).[17]  
6  
7

#### 9 2.4. Costs

10  
11 A health care sector perspective was applied in this study. Thus the study included service  
12  
13 use within the primary sector (general practitioners, medical specialists, therapists and other  
14  
15 privately practicing specialists) and within the hospital sector (in- and outpatient hospital-  
16  
17 based activity). Primary care service was valued via the activity-based fees and hospital-  
18  
19 based care via the DRG/DAGS-tariffs that were used at the time of service provision (see  
20  
21 supplementary Table S1 for DRG tariffs of prostatectomy over the years studied). These  
22  
23 tariffs represent long-term mean costs of the given surgical procedures. The influence of the  
24  
25 lack of person-individual variation in the DRG tariff as a cost estimate for the admission for  
26  
27 prostatectomy was informed by conducting sensitivity analysis where the number of bed days  
28  
29 was added as a proxy for cost intensity. Other sensitivity analysis included adjustment for  
30  
31 experience with robot and patient volume. Costs are reported in Euros (2014 price year).  
32  
33  
34  
35  
36  
37

#### 38 2.5. Identification of relevant aspects of risk selection

39  
40 Characteristics that affect the choice of surgical method were identified in a literature review.  
41  
42 Patient-level characteristics included age, cancer stage and comorbidity and hospital-level  
43  
44 characteristics included organisational structure around the technology such as specialization  
45  
46 of staff. The identified characteristics were defined for the study population based on  
47  
48 information from national registries: age (years), tumour size and nodal involvement based on  
49  
50 the TNM-classification,[18] comorbidity as defined by the Charlson Comorbidity Index,[19]  
51  
52 geographical region of the treating centre, level of experience by time of surgery (to-date  
53  
54 volume of prostatectomies using the particular technology), and organisational structure of the  
55  
56  
57  
58  
59  
60

1  
2  
3 surgical department, referring to whether the robot is used within a single department, used  
4  
5 across several departments or used in a robotic center. Finally, dummies for year of surgery  
6  
7 were specified in order to be able to adjust for changes in DRG tariffs over the years.  
8  
9

## 10 11 2.6. Statistical analysis

12  
13 Summary statistics including Pearson's chi-square tests for categorical variables and ANOVA  
14  
15 for continuous variables were used to describe patient characteristics. All analysis followed a  
16  
17 difference-in-difference (DID) design where the costs attributable to prostatectomy were  
18  
19 estimated as the differences between comparators (OP, LP and RALP) of differences in  
20  
21 resource use and costs between 12-month periods before and after prostatectomy. To further  
22  
23 handle risk selection (as described in the previous section) regression models were used to  
24  
25 adjust the DID-estimates for covariates identified to affect selection into surgical technique.  
26  
27 Regressions were specified as multilevel regressions due to the patient-level being nested in  
28  
29 the hospital-level (centres treating more than one patient) in order not to underestimate  
30  
31 standard errors. The validity of regression models was visually inspected based on  
32  
33 conventional regression diagnostic plots and found to be robust.  
34  
35

36  
37 Results are reported as arithmetic means with 95% confidence intervals (CI) based on  
38  
39 bootstrapping with 5000 replicates due to the skewed nature of the data. All tests were two-  
40  
41 sided with a 5% significance level. The statistical analyses were performed in Stata SE 13.1.  
42  
43  
44

## 45 46 47 2.7. Ethics

48  
49 The study was conducted in accordance with The Person Data Act and hence was approved  
50  
51 by relevant authorities (The Danish Data Protection Agency) (Journal number 2007-58-0010).  
52  
53  
54  
55  
56  
57  
58  
59  
60



### 3. Results

Of the 4309 patients included in this study 52% underwent RALP, 42% underwent OP and 6% underwent LP. There were 22 conversions from either RALP or LP to OP, which were categorized according to the intended technique. The characteristics of the cohort are shown in Table 1. The treatment groups were clinically similar in age, though the RALP group was younger than the OP and LP group (median age 64 vs. 65 years) ( $p < 0.001$ ). The choice of surgical technique differed geographically and with regard to the organisation of the robot technology ( $p < 0.001$ ). Cancer severity was routinely registered for a proportion of patients only, which could be due to the fact that nodal involvement and metastases are rarely an issue for prostatectomy-candidates. However, in case of no nodal involvement patients were less likely to have received a minimally invasive technique ( $p \leq 0.001$ ).

**Table 1** - Comparison of descriptive characteristics (n (% of treatment group))

| Feature                                                                                                                                                                                             | RALP<br>(n=2,241) | OP<br>(n=1,818) | LP<br>(n=250) | p value |
|-----------------------------------------------------------------------------------------------------------------------------------------------------------------------------------------------------|-------------------|-----------------|---------------|---------|
| <b>Age</b> (median (25% - 75%quartile))                                                                                                                                                             | 64 (60 - 67)      | 65 (61 - 68)    | 65 (61 - 68)  | <0.001  |
| <b>Region</b>                                                                                                                                                                                       |                   |                 |               | <0.001  |
| Capital Region of Denmark                                                                                                                                                                           | 1,097 (49)        | 1,272 (70)      | 120 (48)      |         |
| Region of Southern Denmark                                                                                                                                                                          | 121 (5)           | 123 (7)         | 12 (5)        |         |
| Central Denmark Region                                                                                                                                                                              | 554 (25)          | 264 (15)        | 77 (31)       |         |
| North Denmark Region                                                                                                                                                                                | 470 (21)          | 160 (9)         | 39 (16)       |         |
| <b>Organisation type*</b>                                                                                                                                                                           |                   |                 |               | <0.001  |
| Within-department                                                                                                                                                                                   | 878 (39)          | 1,009 (55)      | 101 (41)      |         |
| Cross-departments                                                                                                                                                                                   | 470 (21)          | 160 (9)         | 39 (16)       |         |
| Robotic centre                                                                                                                                                                                      | 894 (40)          | 650 (36)        | 108 (44)      |         |
| <b>Tumour size</b>                                                                                                                                                                                  |                   |                 |               | 0.521   |
| T0-T2                                                                                                                                                                                               | 847 (38)          | 649 (36)        | 81 (33)       |         |
| T3-T4                                                                                                                                                                                               | 324 (14)          | 265 (15)        | 37 (15)       |         |
| Ta & Tis                                                                                                                                                                                            | 0 (0)             | 1 (0)           | 0 (0)         |         |
| Missing data                                                                                                                                                                                        | 1071 (48)         | 904 (50)        | 130 (52)      |         |
| <b>Nodal involvement</b>                                                                                                                                                                            |                   |                 |               | <0.001  |
| N0                                                                                                                                                                                                  | 304 (14)          | 489 (27)        | 46 (19)       |         |
| N1-N3                                                                                                                                                                                               | 40 (2)            | 41 (2)          | 3 (1)         |         |
| Missing data                                                                                                                                                                                        | 1898 (85)         | 1289 (71)       | 199 (80)      |         |
| <b>Metastases</b>                                                                                                                                                                                   |                   |                 |               | 0.001   |
| No                                                                                                                                                                                                  | 652 (29)          | 565 (31)        | 46 (19)       |         |
| Yes                                                                                                                                                                                                 | 0 (0)             | 1 (0)           | 0 (0)         |         |
| Missing data                                                                                                                                                                                        | 1590 (71)         | 1253 (69)       | 202 (81)      |         |
| <b>CCI</b>                                                                                                                                                                                          |                   |                 |               | 0.401   |
| 0                                                                                                                                                                                                   | 3 (0)             | 1 (0)           | 0 (0)         |         |
| 1                                                                                                                                                                                                   | 0 (0)             | 1 (0)           | 0 (0)         |         |
| 2                                                                                                                                                                                                   | 2,230 (99)        | 1,810 (100)     | 245 (99)      |         |
| 3                                                                                                                                                                                                   | 4 (0)             | 2 (0)           | 2 (1)         |         |
| 6                                                                                                                                                                                                   | 5 (0)             | 5 (0)           | 1 (0)         |         |
| RALP = Robot-assisted laparoscopic prostatectomy; OP = Open prostatectomy; LP = Laparoscopic prostatectomy; Ta = Tumour without invasion; Tis = Carcinoma in situ; CCI = Charlson comorbidity index |                   |                 |               |         |
| *Organisation type refers to whether the robot is used within a single department, used across several departments or used in a robotic center.                                                     |                   |                 |               |         |

Service use per patient, including length of stay, and the unadjusted mean costs of the patients' health care are depicted in Table 2 and 3, respectively. All treatment groups had statistically significant higher service use in the year following the surgery. No differences were found

when comparing RALP to LP but OP was associated with 2.6 extra bed days and slightly higher primary care service use (0.5 more contacts) compared to RALP. This was, however, not reflected in the costs, as RALP was associated with the highest costs primarily caused by differences in inpatient care (Table 3).

**Table 2** – Health care service use in relation to prostatectomy. Values are mean per patient with 95% CI

|                                                                                                                                    | Primary care      | Hospital-based care  |                      |                   |
|------------------------------------------------------------------------------------------------------------------------------------|-------------------|----------------------|----------------------|-------------------|
|                                                                                                                                    |                   | Outpatient           |                      | Inpatient         |
|                                                                                                                                    |                   | Number of admissions | Number of admissions | Length of stay    |
| <b>OP</b>                                                                                                                          |                   |                      |                      |                   |
| Before                                                                                                                             | 11.03             | 08.05                | 00.04                | 01.00             |
| After                                                                                                                              | 12.01             | 09.05                | 01.07                | 06.06             |
| Difference                                                                                                                         | 0.8 (0.5 – 1.0)   | 1.0 (0.6 – 1.4)      | 1.3 (1.2 – 1.4)      | 5.5 (5.2 – 5.9)   |
| <b>LP</b>                                                                                                                          |                   |                      |                      |                   |
| Before                                                                                                                             | 10.03             | 07.08                | 00.03                | 01.00             |
| After                                                                                                                              | 11.01             | 08.05                | 01.04                | 04.06             |
| Difference                                                                                                                         | 0.8 (0.1 – 1.5)   | 0.7 (-0.3 – 1.6)     | 1.1 (1.0 – 1.2)      | 3.6 (2.7 – 4.4)   |
| <b>RALP</b>                                                                                                                        |                   |                      |                      |                   |
| Before                                                                                                                             | 10.08             | 07.08                | 00.03                | 00.08             |
| After                                                                                                                              | 11.01             | 09.00                | 01.05                | 03.08             |
| Difference                                                                                                                         | 0.3 (0.1 – 0.5)   | 1.2 (0.8 – 1.5)      | 1.2 (1.1 – 1.2)      | 3.0 (2.7 – 3.3)   |
| <b>Robot attributable service use</b>                                                                                              |                   |                      |                      |                   |
| Compared to OP                                                                                                                     | -0.5 (-0.8 – 0.1) | 0.2 (-0.4 – 0.7)     | -0.1 (-0.2 – 0.0)    | -2.6 (-3.0 – 2.1) |
| Compared to LP                                                                                                                     | -0.5 (-1.3 – 0.2) | 0.5 (-0.5 – 1.5)     | 0.1 (-0.1 – 0.2)     | -0.6 (-1.5 – 0.3) |
| RALP = Robot-assisted laparoscopic prostatectomy; OP = Open prostatectomy; LP = Laparoscopic prostatectomy; CI=confidence interval |                   |                      |                      |                   |

1  
2  
3  
4  
5  
6  
7  
8  
9  
10  
11  
12  
13  
14  
15  
16  
17  
18  
19  
20  
21  
22  
23  
24  
25  
26  
27  
28  
29  
30  
31  
32  
33  
34  
35  
36  
37  
38  
39  
40  
41  
42  
43  
44  
45  
46  
47  
48  
49

**Table 3** – Health care costs in relation to prostatectomy. Values are mean costs (2014-€) per patient with 95% CI

| Costs                                                                                                                              | Primary care    | Hospital-based care |                       | Total                 |
|------------------------------------------------------------------------------------------------------------------------------------|-----------------|---------------------|-----------------------|-----------------------|
|                                                                                                                                    |                 | Outpatient          | Inpatient             |                       |
| <b>OP</b>                                                                                                                          |                 |                     |                       |                       |
| Before                                                                                                                             | 442             | 2720                | 1551                  | 4714                  |
| After                                                                                                                              | 429             | 3432                | 11429                 | 15286                 |
| Difference                                                                                                                         | -13 (-29 – 3)   | 712 (493 – 931)     | 9878 (9532 – 10224)   | 10572 (10135 – 11010) |
| <b>LP</b>                                                                                                                          |                 |                     |                       |                       |
| Before                                                                                                                             | 415             | 2753                | 1271                  | 4440                  |
| After                                                                                                                              | 416             | 2584                | 10856                 | 13856                 |
| Difference                                                                                                                         | 0 (-46 – 46)    | -169 (-624 – 285)   | 9585 (8663 – 10507)   | 9416 (8343 – 10489)   |
| <b>RALP</b>                                                                                                                        |                 |                     |                       |                       |
| Before                                                                                                                             | 421             | 2724                | 1242                  | 4392                  |
| After                                                                                                                              | 392             | 2878                | 14700                 | 17978                 |
| Difference                                                                                                                         | -29 (-43 – -15) | 154 (-18 – 325)     | 13458 (13057 – 13859) | 13586 (13132 – 14041) |
| <b>Robot attributable costs</b>                                                                                                    |                 |                     |                       |                       |
| Compared to OP                                                                                                                     | -16 (-37 – 5)   | -558 (-832 – -284)  | 3580 (3054 – 4107)    | 3014 (2380 – 3648)    |
| Compared to LP                                                                                                                     | -29 (-77 – 18)  | 323 (-178 – 823)    | 3873 (2865 – 4882)    | 4170 (2986 – 5354)    |
| RALP = Robot-assisted laparoscopic prostatectomy; OP = Open prostatectomy; LP = Laparoscopic prostatectomy; CI=confidence interval |                 |                     |                       |                       |

1  
2  
3 Figure 1 illustrates the cost patterns over time. The process of getting referred by the general  
4 practitioner to the hospital for diagnosis and later treatment seems to be reflected as a rise of  
5 costs in the primary care sector, is followed by a rise in outpatient care and later in inpatient  
6 care at the time of the prostatectomy. Outpatient follow-up is clearly evident but is not set at a  
7 fixed time. No clear differences stood out except for higher inpatient costs of RALP at the  
8 time of the index prostatectomy. Both in the year prior to and after the prostatectomies  
9 included in this study the patterns are rather similar especially for OP and RALP while LP  
10 fluctuates more due to fewer patients having received this surgical technique.

11  
12 Table 4 illustrates DID-estimates similar to those of table 3 except that multivariate modelling  
13 is used to adjust for eventual residual risk selection not handled by the DID-analytical  
14 strategy. Results support the unadjusted results as significant differences are revealed when  
15 RALP is held against OP and LP respectively. The adjusted costs attributable to RALP varied  
16 as RALP was associated with an extra € 3860 (95% CI, 559 – 7160) when held against LP  
17 and € 2459 (95% CI, 1377 – 3540) when compared to OP.

18  
19 Costs were significantly higher when patients were operated in Region of Southern Denmark  
20 or North Denmark Region ( $p < 0.05$ ), and when they were operated in hospitals with a robotic  
21 centre ( $p < 0.05$ ).

22  
23 An extended model was applied to assess the role of informative missings on cancer severity.  
24 Adding cancer severity to the model did not substantially affect the cost attributable to RALP.  
25 Tumours categorized as T3-T4 were associated with significant additional costs for all  
26 surgical techniques and having missing data with respect to nodal involvement was associated  
27 with decreased costs but there was no significant interaction between either tumour size or  
28 nodal involvement and surgical technique.

**Table 4** – Adjusted estimates of the costs attributable to RALP: Main model compared to extended model, which includes adjustment for tumour size and nodal involvement. Values are mean costs (2014-€) with 95% CI.

| Feature                                                                                                                            | Main model            |         | Extended model        |         |
|------------------------------------------------------------------------------------------------------------------------------------|-----------------------|---------|-----------------------|---------|
|                                                                                                                                    | Coefficient           | p value | Coefficient           | p value |
| <b>Treatment</b>                                                                                                                   |                       |         |                       |         |
| RALP (reference)                                                                                                                   |                       |         |                       |         |
| OP                                                                                                                                 | -2459 (-3540 – -1377) | 0.003   | -2756 (-3965 – -1548) | 0.003   |
| LP                                                                                                                                 | -3860 (-7160 – -559)  | 0.031   | -3990 (-7073 – -906)  | 0.023   |
| <b>Age</b>                                                                                                                         |                       |         |                       |         |
|                                                                                                                                    | 14 (-43 – 71)         | 0.541   | 7 (-66 – 80)          | 0.815   |
| <b>Region</b>                                                                                                                      |                       |         |                       |         |
| Central Denmark Region (reference)                                                                                                 |                       |         |                       |         |
| Capital Region of Denmark                                                                                                          | 85 (-689 – 860)       | 0.775   | 881 (-833 – 2594)     | 0.227   |
| Region of Southern Denmark                                                                                                         | 1907 (610 – 3204)     | 0.015   | 1882 (-13 – 3777)     | 0.051   |
| North Denmark Region                                                                                                               | 241 (156 – 327)       | 0.001   | 404 (-288 – 1096)     | 0.181   |
| <b>Organisation type</b>                                                                                                           |                       |         |                       |         |
| Within-speciality (reference)                                                                                                      |                       |         |                       |         |
| Robotic centre                                                                                                                     | 1028 (460 – 1595)     | 0.007   | 978 (-181 – 2136)     | 0.079   |
| <b>Year of surgery</b>                                                                                                             |                       |         |                       |         |
| 2006 (reference)                                                                                                                   |                       |         |                       |         |
| 2007                                                                                                                               | 376 (-264 – 1016)     | 0.178   | 304 (-253 – 861)      | 0.204   |
| 2008                                                                                                                               | 1386 (-41 – 2813)     | 0.054   | 1222 (-51 – 2496)     | 0.056   |
| 2009                                                                                                                               | -688 (-1627 – 250)    | 0.111   | -919 (-1870 – 32)     | 0.055   |
| 2010                                                                                                                               | 910 (-540 – 2361)     | 0.156   | 668 (-734 – 2070)     | 0.257   |
| 2011                                                                                                                               | 1244 (-226 – 2714)    | 0.079   | 971 (-552 – 2494)     | 0.151   |
| 2012                                                                                                                               | 1423 (205 – 2641)     | 0.032   | 1371 (433 – 2309)     | 0.015   |
| 2013                                                                                                                               | 3036 (1338 – 4734)    | 0.008   | 3058 (1591 – 4525)    | 0.004   |
| <b>Tumour size</b>                                                                                                                 |                       |         |                       |         |
| T0-T2 (reference)                                                                                                                  |                       |         |                       |         |
| T3-T4                                                                                                                              |                       |         | 1172 (683 – 1660)     | 0.003   |
| Missing data                                                                                                                       |                       |         | 1599 (-1270 – 4469)   | 0.197   |
| <b>Nodal involvement</b>                                                                                                           |                       |         |                       |         |
| N0 (reference)                                                                                                                     |                       |         |                       |         |
| N1-N3                                                                                                                              |                       |         | -2676 (-5796 – 444)   | 0.076   |
| Missing data                                                                                                                       |                       |         | -1219 (-2102 – -335)  | 0.019   |
| <b>Constant</b>                                                                                                                    |                       |         |                       |         |
|                                                                                                                                    | 10803 (7643 – 13964)  | 0.001   | 11136 (7111 – 15161)  | 0.002   |
| n                                                                                                                                  |                       | 4309    |                       | 4309    |
| R <sup>2</sup>                                                                                                                     |                       | 0.041   |                       | 0.046   |
| Root mean standard error                                                                                                           |                       | 10232   |                       | 10213   |
| RALP = Robot-assisted laparoscopic prostatectomy; OP = Open prostatectomy; LP = Laparoscopic prostatectomy; CI=confidence interval |                       |         |                       |         |

#### 4. Discussion

Practically all prostatectomies performed in Danish hospitals over a period of 8 years were included in this analysis, which focussed on the broad health care sector consequences of using robot technology. The costs of RALP were found to be higher than the costs of both OP and LP but only to an extent that corresponds to the difference in DRG tariffs across these surgical techniques. Thus, no evidence was found of RALP impacting service use in primary care or readmissions to hospitals. Hence, the main contribution of this study is an important first piece of evidence that, when considering a broad health care sector perspective and a longer time horizon than the index admission, the use of RALP does not seem to generate cost consequences apart from the additional cost associated with the index surgery.

A recent study by Hughes et al. estimated the resource use in the postoperative phase after prostatectomy in a hospital perspective and found that RALP led to costs savings, when the cost of the index surgery was excluded from the equation.[20] This study is in many ways similar to the present in that it is based on a large sample and considers extra-index-surgery consequences of using robot technology. It has however a couple of weaknesses that is circumvented in the present study. First, it includes patients who were referred to centres not offering robot technology and who could have different profiles than those referred to centres offering robot technology. Second, the investigators did not analytically handle the fact that patients were selected into surgical technique. It thus remains unclear whether the difference between the present results of no cost saving and Hughes et al.s' finding of a cost saving is due to these weaknesses or whether they are simply do to differences between the British and the Danish context.

Previous studies have assessed the costs of robot technology in an analytical perspective restricted to hospital costs of the index surgery. Kim et al. found that RALP, despite shorter

1  
2  
3 hospital stays, was associated with higher operation costs than OP by an average that more or  
4  
5 less corresponds to the difference in Danish DRG tariffs between surgical techniques (mean  
6  
7 \$11932 vs. \$9390;  $p < 0.001$ ).[21] Similarly, Bolenz et al. found hospital costs to be higher  
8  
9 for RALP compared to LP and OP, which was a bit lower but still within the level of the  
10  
11 difference in the Danish DRG tariffs (median \$6752 for RALP, \$5687 LRP and \$4437 for  
12  
13 OP;  $p < 0.001$ ).[12] These studies were conducted in the United States that is not normally  
14  
15 considered to be comparable as a setting due to different system structures and price levels.  
16  
17 The strengths of this study relates to the design where a cohort of consecutive patients are  
18  
19 observed and where appropriate analytical effort is made into handling selection for surgical  
20  
21 techniques. The use of the DID-design serves to minimize the effect of selection bias, which  
22  
23 can be an important issue in observational designs that may have been chosen as the only  
24  
25 option or in priority of external validity. This design has the ability to cleanse out exogenous  
26  
27 factors such as time and to isolate the costs related to the prostatectomy from the costs related  
28  
29 to e.g. chronic comorbidities or other time invariant patient characteristics.[22] The design is  
30  
31 particularly powerful when combined with extra means for handling selection and multilevel  
32  
33 multivariate regression was here used to adjust for hospital-level characteristics as well as  
34  
35 patient-level characteristics that could have caused confounding. It should also be mentioned  
36  
37 that, we were able to validate the consecutiveness of data and the coding of surgical  
38  
39 techniques by comparing register data to the independent clinical database UroLap, which  
40  
41 supported that data were truly representing consecutive patients and which gave no reason to  
42  
43 suspect misclassification.[23]

44  
45  
46  
47  
48  
49 In the early stages of this work we suspected that the cost implications of robot technology  
50  
51 would be affected by centre volume and experience with the technology. We thus included  
52  
53 variables in the regression model for these organisational-level covariates but they appeared  
54  
55 to be insignificant contributors and were thus excluded from the reported main model. Also,  
56  
57  
58  
59  
60



1  
2  
3 we sought to assess whether there was any effect modification from point at the learning  
4  
5 curve by including interaction terms between the dummies of year of surgery and the cost  
6  
7 consequences of robot technology but again, these turned out to be insignificant and were thus  
8  
9 left out in the main model. The geographical variations found could reflect patient  
10  
11 heterogeneity caused by both cultural and structural variations such as different waiting times  
12  
13 and referral practice.  
14  
15

16  
17  
18 The main weakness of this study lies in the premises of basing it on registry data, where  
19  
20 severity and other clinical details are not routinely recorded. One variable of relevance to  
21  
22 choice of surgical technique would be body mass index (BMI).[24] Another weakness  
23  
24 concerns the missing values on cancer stage, as it appeared that doctors are not routinely  
25  
26 registering TNM status in relation to prostatectomy. Tumour size was registered for about  
27  
28 50% of patients while nodal involvement and metastasis were registered for around 25% of  
29  
30 patients only. Whether this reflects irrelevance of registration in relation to the choice of  
31  
32 surgical technique and expected outcome or other reasons is unclear but conducting parallel  
33  
34 analysis with and without TNM status did not substantially affect results. And more  
35  
36 importantly, patients with missing values on the TNM status did not seem to be different from  
37  
38 patients with complete data. A number of sensitivity analyses were undertaken to address  
39  
40 limitations of the study. First, the use of national DAGS and DRG tariffs as an expression for  
41  
42 the patient-level cost of hospital service ignores patient- and hospital level variation. E.g.  
43  
44 differences in coefficient of utilization are not reflected in the tariffs. A sensitivity analysis  
45  
46 where the number of bed days was included in the model was therefore undertaken and  
47  
48 confirmed that variation captured in bed days had no influence on the main result. This  
49  
50 analysis is however no full compensation for the lack of patient-level variation and this limits  
51  
52 the interpretation of the analysis to the broad-sector consequences of using robot technology  
53  
54  
55  
56  
57  
58  
59  
60

1  
2  
3 as opposed to the technical efficiency or productivity that characterises the operation of the  
4  
5 robot technology. Also it should be noted that time dummies were included in the base-case  
6  
7 model in order to take out variation that was due to changes in the DRG tariffs over time. If  
8  
9 centres in the future administer the robot technology (and other surgical techniques for that  
10  
11 sake) in a more of less efficient way, e.g. by operating more patients per robot this will affect  
12  
13 the cost of index surgery (and should lead to an adjustment of the DRG tariff) whereas the  
14  
15 main focus of this analysis, the broader-sector cost consequences, should be unaffected if the  
16  
17 quality level is kept.  
18  
19

20  
21 Further research seems warranted as RALP is here found to be overall more costly than its  
22  
23 alternatives while there appears to be limited evidence for a clinical benefit to the patients. At  
24  
25 best, a randomised controlled trial comparing RALP to both LP and OP should be conducted  
26  
27 and followed by a cost effectiveness evaluation. LP is a relatively rare choice of surgical  
28  
29 approach in Denmark although it has been found to create health- and functional outcomes  
30  
31 comparable to those of RALP.[3,9,25] However, there is evidence that RALP is a superior  
32  
33 choice with regards to the risk of erectile dysfunction.[26] If this was also the case in the  
34  
35 present cohort it was not reflected in the number of visits to neither hospitals nor the primary  
36  
37 health care sector.  
38  
39  
40  
41  
42  
43  
44

## 45 **5. Conclusions**

46  
47  
48  
49 No support for the argument of the additional costs of using robots for prostatectomy being  
50  
51 outweighed by cost savings during a longer-term follow up and in a broader health care  
52  
53 perspective was found. The policy interpretation is that the use of robots for prostatectomy  
54  
55 should be driven by clinical superiority and that formal effectiveness analysis is required to  
56  
57  
58  
59  
60

1  
2  
3 determine whether the current and eventual new purchasing of robot capacity is best used for  
4  
5 prostatectomy.  
6  
7  
8  
9  
10

## 11 **6. Acknowledgements**

12  
13  
14  
15  
16 We would like to thank Line Stjernholm Tipsmark (LST) for assistance in requisitioning data  
17  
18 and for performing preliminary analyses.  
19  
20  
21  
22  
23  
24

## 25 **7. Conflicts of Interest statement**

26  
27  
28  
29 Vibe Bolvig Hyldgård: None

30  
31 Karin Rosenkilde Laursen: None

32  
33 Johan Poulsen: None

34  
35 Rikke Søgaard: None  
36  
37  
38  
39  
40  
41  
42

## 43 **8. Funding**

44  
45  
46  
47 This research received no specific grant from any funding agency in the public, commercial  
48  
49 or not-for-profit sectors  
50  
51  
52  
53  
54  
55  
56  
57  
58  
59  
60

1  
2  
3 **9. Data sharing statement**  
4  
5  
6

7 Unfortunately no additional data are available  
8  
9

10  
11  
12  
13  
14 **10. Contributors**  
15  
16

17  
18 Drafting the manuscript: VBH. Analysis and interpretation: VBH+RS. Statistical analysis:  
19 VBH+KRL. Concept and design: JP+RS. Acquisition of data: RS+KRL+LST. Critical  
20  
21 revision of manuscript: JP+RS+KRL+VBH. Supervision: RS.  
22  
23  
24  
25  
26  
27  
28  
29  
30  
31  
32  
33  
34  
35  
36  
37  
38  
39  
40  
41  
42  
43  
44  
45  
46  
47  
48  
49  
50  
51  
52  
53  
54  
55  
56  
57  
58  
59  
60

## References

1. De Carlo F, Celestino F, Verri C, Masedu F, Liberati E, Di Stasi SM. Retropubic, Laparoscopic, and Robot-Assisted Radical Prostatectomy: Surgical, Oncological, and Functional Outcomes: A Systematic Review. *Urol. Int.* 2014;93:373–83.
2. Ficarra V, Novara G, Artibani W, Cestari A, Galfano A, Graefen M, et al. Retropubic, Laparoscopic, and Robot-Assisted Radical Prostatectomy: A Systematic Review and Cumulative Analysis of Comparative Studies. *Eur. Urol.* 2009;55:1037–63.
3. Close A, Robertson C, Rushton S, Shirley M, Vale L, Ramsay C, et al. Comparative cost-effectiveness of robot-assisted and standard laparoscopic prostatectomy as alternatives to open radical prostatectomy for treatment of men with localised prostate cancer: a health technology assessment from the perspective of the UK Natio. *Eur. Urol. European Association of Urology*; 2013;64:361–9.
4. Bolenz C, Freedland SJ, Hollenbeck BK, Lotan Y, Lowrance WT, Nelson JB, et al. Costs of radical prostatectomy for prostate cancer: a systematic review. *Eur. Urol. European Association of Urology*; 2012;65:316–24.
5. Trinh Q-D, Sammon J, Sun M, Ravi P, Ghani KR, Bianchi M, et al. Perioperative Outcomes of Robot-Assisted Radical Prostatectomy Compared With Open Radical Prostatectomy: Results From the Nationwide Inpatient Sample. *Eur. Urol.* 2012;61:679–85.
6. Carlsson S, Nilsson AE, Schumacher MC, Jonsson MN, Volz DS, Steineck G, et al. Surgery-related complications in 1253 robot-assisted and 485 open retropubic radical prostatectomies at the Karolinska University Hospital, Sweden. *Urology. Elsevier Inc.*; 2010;75:1092–7.
7. Davis JW, Kreaden US, Gabbert J, Thomas R. Learning curve assessment of robot-assisted radical prostatectomy compared with open-surgery controls from the premier perspective

1  
2  
3 database. *J. Endourol.* 2014;28:560–6.  
4

5  
6 8. Hofer MD, Meeks JJ, Cashy J, Kundu S, Zhao LC. Impact of increasing prevalence of  
7  
8 minimally invasive prostatectomy on open prostatectomy observed in the national inpatient  
9  
10 sample and national surgical quality improvement program. *J. Endourol.* 2013;27:102–7.  
11

12  
13 9. Berge V, Berg RE, Hoff JR, Wessel N, Diep LM, Karlsen SJ, et al. A Prospective Study of  
14  
15 Transition From Laparoscopic to Robot-assisted Radical Prostatectomy: Quality of Life  
16  
17 Outcomes After 36-Month Follow-up. *Urology.* Elsevier Inc.; 2013;81:781–6.  
18

19  
20 10. Busch J, Gonzalzo ML, Leva N, Ferrari M, Cash H, Kempkensteffen C, et al. Matched  
21  
22 comparison of robot-assisted, laparoscopic and open radical prostatectomy regarding  
23  
24 pathologic and oncologic outcomes in obese patients. *World J. Urol.* 2014;397–402.  
25

26  
27 11. Hohwü L, Borre M, Ehlers L, Venborg Pedersen K. A short-term cost-effectiveness study  
28  
29 comparing robot-assisted laparoscopic and open retropubic radical prostatectomy. *J. Med.*  
30  
31 *Econ.* 2011;14:403–9.  
32

33  
34 12. Bolenz C, Gupta A, Hotze T, Ho R, Cadeddu J a, Roehrborn CG, et al. Cost comparison  
35  
36 of robotic, laparoscopic, and open radical prostatectomy for prostate cancer. *Eur. Urol.*  
37  
38 2010;57:453–8.  
39

40  
41 13. CFK - Folkesundhed & Kvalitetsudvikling. Medicinsk teknologivurdering af  
42  
43 robotassisteret kirurgi (HTA of robot-assisted surgery). Aarhus; 2015.  
44

45  
46 14. Lynge E, Sandegaard JL, Rebolj M. The Danish National Patient Register. *Scand. J.*  
47  
48 *Public Health.* 2011;39:30–3.  
49

50  
51 15. CPR-Kontoret. Udtræksvejledning for offentlige brugere. Version 10 Denmark; 2015 p.  
52  
53 1–98.  
54

55  
56 16. Andersen JS, Olivarius NDF, Krasnik A. The Danish National Health Service Register.  
57  
58  
59  
60

1  
2  
3 Scand. J. Public Health. 2011;39:34–7.  
4

5  
6 17. Sundhedsstyrelsen. Takstberegning for sygehusene. Version 2.0 Copenhagen; 2009 p. 12.  
7

8  
9 18. NIH National Cancer Institute. Cancer Staging [Internet]. [cited 2015 Oct 2]. p. Cancer  
10 staging. Available from: <http://www.cancer.gov/about-cancer/diagnosis->  
11 [staging/staging/staging-fact-sheet](http://www.cancer.gov/about-cancer/diagnosis-staging/staging/staging-fact-sheet)  
12  
13

14  
15 19. Charlson ME, Pompei P, Ales KL, MacKenzie CR. A new method of classifying  
16 prognostic comorbidity in longitudinal studies: development and validation. *J. Chronic Dis.*  
17 1987;40:373–83.  
18  
19

20  
21 20. Hughes D, Camp C, O’Hara J, Adshead J. Health resource use following robot-assisted  
22 surgery versus open and conventional laparoscopic techniques in oncology: Analysis of  
23 English secondary care data for radical prostatectomy and partial nephrectomy. *BJU Int.*  
24 2016;  
25  
26  
27  
28  
29

30  
31 21. Kim SP, Shah ND, Karnes RJ, Weight CJ, Shippee ND, Han LC, et al. Hospitalization  
32 costs for radical prostatectomy attributable to robotic surgery. *Eur. Urol.* 2013;64:11–6.  
33  
34  
35

36  
37 22. Imbens G, Wooldridge J. Recent developments in the econometrics of program evaluation.  
38 *J. Econ. Lit.* 2009;47:5–86.  
39  
40

41  
42 23. Dansk Urologisk Selskab. UroLap. Årsrapport 2013. København; 2014.  
43  
44

45  
46 24. Ramsay C, Pickard R, Robertson C, Close a, Vale L, Armstrong N, et al. Systematic  
47 review and economic modelling of the relative clinical benefit and cost-effectiveness of  
48 laparoscopic surgery and robotic surgery for removal of the prostate in men with localised  
49 prostate cancer. *Health Technol. Assess.* 2012 Jan.  
50  
51

52  
53 25. Kasraeian A, Barret E, Chan J, Sanchez-Salas R, Validire P, Cathelineau X, et al.  
54  
55

56  
57 Comparison of the rate, location and size of positive surgical margins after laparoscopic and  
58  
59  
60

1  
2  
3 robot-assisted laparoscopic radical prostatectomy. *BJU Int.* 2011;108:1174–8.  
4

5  
6 26. Asimakopoulos AD, Pereira Fraga CT, Annino F, Pasqualetti P, Calado A a., Mugnier C.  
7

8 Randomized comparison between laparoscopic and robot-assisted nerve-sparing radical  
9

10 prostatectomy. *J. Sex. Med.* 2011;8:1503–12.  
11  
12  
13  
14  
15  
16  
17  
18  
19  
20  
21  
22  
23  
24  
25  
26  
27  
28  
29  
30  
31  
32  
33  
34  
35  
36  
37  
38  
39  
40  
41  
42  
43  
44  
45  
46  
47  
48  
49  
50  
51  
52  
53  
54  
55  
56  
57  
58  
59  
60



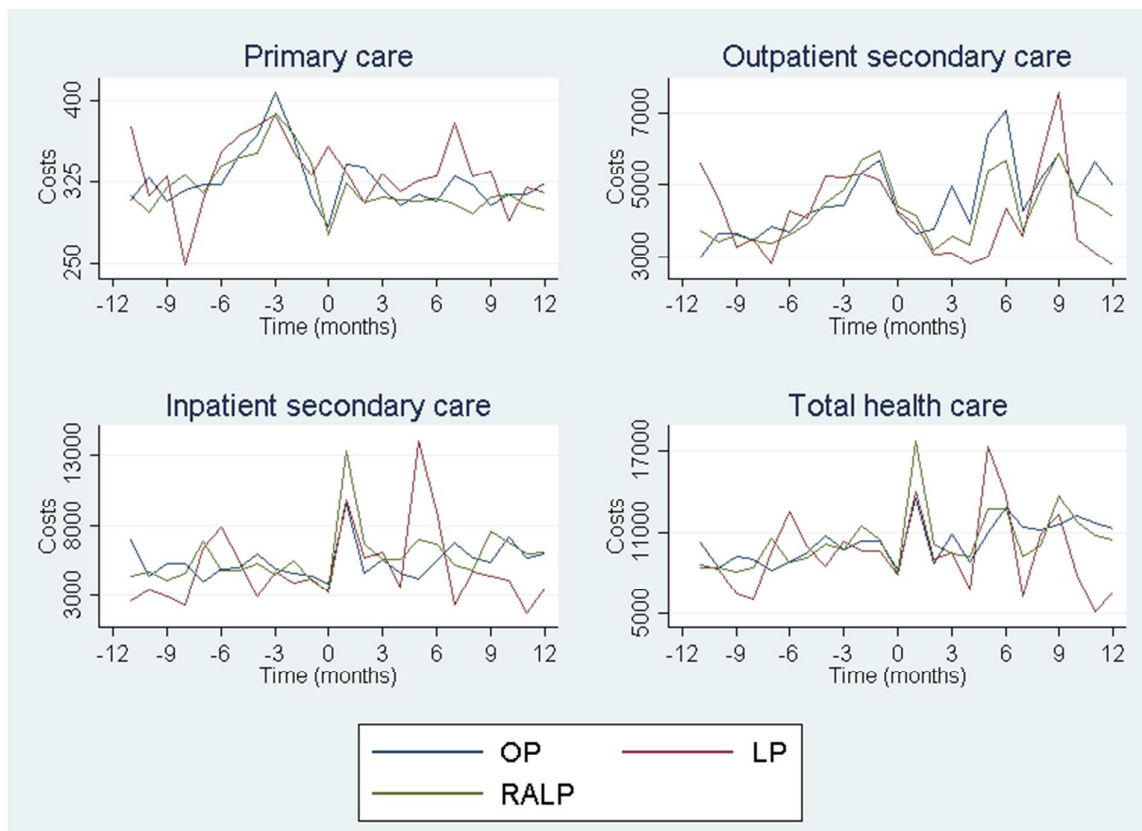

**Figure 1** – Time series graphics for the unadjusted mean costs (€). Month zero marks the time of prostatectomy, price year 2014.  
 RALP = Robot-assisted laparoscopic prostatectomy; OP = Open prostatectomy; LP = Laparoscopic prostatectomy

## Supplementary material

**Table S1** - DRG tariffs over the study period (2014-€)

| Year of operation | DRG tariff |         | Difference |
|-------------------|------------|---------|------------|
|                   | RALP       | OP & LP |            |
| 2006              | 13.666     | 10.746  | 2.920      |
| 2007              | 13.291     | 10.260  | 3.031      |
| 2008              | 13.218     | 10.101  | 3.118      |
| 2009              | 11.397     | 8.087   | 3.310      |
| 2010              | 13.082     | 7.751   | 5.331      |
| 2011              | 13.362     | 8.316   | 5.046      |
| 2012              | 13.547     | 8.732   | 4.815      |
| 2013              | 14.250     | 8.779   | 5.471      |

# BMJ Open

## Robot-assisted surgery in a broader health care perspective: A difference-in-difference-based cost analysis of a national prostatectomy cohort

|                                 |                                                                                                                                                                                                                                                                                                                                                        |
|---------------------------------|--------------------------------------------------------------------------------------------------------------------------------------------------------------------------------------------------------------------------------------------------------------------------------------------------------------------------------------------------------|
| Journal:                        | <i>BMJ Open</i>                                                                                                                                                                                                                                                                                                                                        |
| Manuscript ID                   | bmjopen-2016-015580.R1                                                                                                                                                                                                                                                                                                                                 |
| Article Type:                   | Research                                                                                                                                                                                                                                                                                                                                               |
| Date Submitted by the Author:   | 12-May-2017                                                                                                                                                                                                                                                                                                                                            |
| Complete List of Authors:       | Hyldgård, Vibe; Aarhus Universitet, Public Health; DEFACTUM, Health Economics<br>Laursen, Karin; Aarhus Universitet, Department of Public Health<br>Poulsen, Johan; Aalborg University Hospital; Department of Urology, King's College Hospital<br>Søgaard, Rikke; Aarhus Universitet, Department of Public Health and Department of Clinical Medicine |
| <b>Primary Subject Heading</b>: | Health economics                                                                                                                                                                                                                                                                                                                                       |
| Secondary Subject Heading:      | Urology                                                                                                                                                                                                                                                                                                                                                |
| Keywords:                       | HEALTH ECONOMICS, Prostate cancer, Robotics and Laparoscopy, Robot-assisted surgery, Cost analysis, Prostatectomy                                                                                                                                                                                                                                      |
|                                 |                                                                                                                                                                                                                                                                                                                                                        |

SCHOLARONE™  
Manuscripts

1  
2  
3  
4  
5  
6  
7  
8  
9  
10  
11 Robot-assisted surgery in a broader health care  
12 perspective: A difference-in-difference-based  
13 cost analysis of a national prostatectomy cohort  
14  
15  
16  
17  
18  
19  
20  
21  
22  
23

24  
25 Vibe Bolvig Hyldgård<sup>a,b</sup> (VBH), [vibe.bolvig@ph.au.dk](mailto:vibe.bolvig@ph.au.dk)

26 Karin Rosenkilde Laursen<sup>b</sup> (KRL), [krl@ph.au.dk](mailto:krl@ph.au.dk)

27  
28 Johan Poulsen<sup>c,d</sup> (JP), [jop@rm.dk](mailto:jop@rm.dk)

29  
30 Rikke Søgaard<sup>b,c</sup> (RS), [rs@ph.au.dk](mailto:rs@ph.au.dk)

31  
32 <sup>a</sup> Health Economics, DEFACTUM, Central Denmark Region, DK

33  
34 <sup>b</sup> Department of Public Health, Aarhus University, DK

35  
36 <sup>c</sup> Aalborg University Hospital, DK

37  
38 <sup>d</sup> Department of Urology, King's College Hospital, London, UK

39  
40 <sup>e</sup> Department of Clinical Medicine, Aarhus University, DK

41  
42  
43  
44  
45  
46  
47  
48  
49  
50 Corresponding author: Vibe Bolvig Hyldgård  
51 Address: Olof Palmes Allé 15, 8200 Aarhus N, DK  
52 Email: [vibe.bolvig@rm.dk](mailto:vibe.bolvig@rm.dk) / Fax: 78414029  
53 Phone: +45 31191504  
54  
55  
56  
57  
58  
59  
60

## Abstract

**Objective:** To estimate costs attributable to robot-assisted laparoscopic prostatectomy (RALP) as compared to open (OP) and laparoscopic (LP) prostatectomies in a national health-service perspective.

**Patients and methods:** Register-based cohort study of 4309 consecutive patients who underwent prostatectomy from 2006 to 2013 (2241 RALP, 1818 OP and 250 LP). Patients were followed from 12 months before to 12 months after prostatectomy with respect to service use in primary care (general practitioners, therapists, specialists etc.) and hospitals (in- and outpatient activity related to prostatectomy and comorbidity). Tariffs of the activity-based remuneration system for primary care and the Diagnosis-Related Grouping case-mix system for hospital-based care were used to value service use. Costs attributable to RALP were estimated using a difference-in-difference analytical approach and adjusted for patient- and hospital-level risk selection using multilevel regression.

**Results:** No significant effect of RALP on resource-use was observed except for a marginally lower use of primary care and fewer bed days as compared with OP (not LP). The overall cost consequence of RALP was estimated at an additional €2459 (95% CI 1377 – 3540,  $p = 0.003$ ) as compared with OP and an additional €3860 (95% CI 559 – 7160,  $p = 0.031$ ) as compared with LP, mainly due to higher cost intensity during the index admissions.

**Conclusions:** In this study from the Danish context, the use of RALP generates a factor 1.3 additional cost when compared with OP and a factor 1.6 additional cost when compared with LP, on average, based on 12 months follow-up. The policy interpretation is that the use of robots for prostatectomy should be driven by clinical superiority and that formal effectiveness analysis is required to determine whether the current and eventual new purchasing of robot capacity is best used for prostatectomy.

1  
2  
3 **Keywords:** Cost analysis; Economics; Prostate cancer; Prostatectomy; Robot-assisted  
4  
5 surgery; Robotics and Laparoscopy  
6  
7

8  
9  
10 **Strengths and limitations of this study**  
11

- 12 • A broad health care sector perspective with 12 months follow-up of a national cohort.
- 13 • A strong analytical approach including a quasi-experimental difference-in-difference  
14 design in combination with the use of regression-based adjustment for selection..  
15  
16
- 17 • Adjustment for body mass index could not be undertaken due to this information not  
18 being available in national register data.  
19  
20
- 21 • A proportion of patients had missing values regarding cancer stage but these patients  
22 did not seem to be different from patients with complete data.  
23  
24  
25  
26  
27  
28  
29  
30  
31  
32  
33  
34  
35  
36  
37  
38  
39  
40  
41  
42  
43  
44  
45  
46  
47  
48  
49  
50  
51  
52  
53  
54  
55  
56  
57  
58  
59  
60

## 1. Introduction

The most common cancer among men older than 50 years is prostate cancer.[1] The incidence has increased notably since the diagnostic prostate-specific antigen test was introduced and, in accordance, the incidence of prostatectomy has increased rapidly.[1–3] Internationally, the transition from open prostatectomy (OP) to laparoscopic prostatectomy (LP) was much slower than the on-going transition from LP to robot-assisted laparoscopic prostatectomy (RALP), which is today the most frequently used technique in North America and in some parts of Europe.[4] As a consequence of the rapid dissemination of RALP, the literature comparing RALP to LP is scarce.

The minimally invasive methods LP and RALP have been found to hold some peri-operational advantages over OP such as less bleeding and fewer complications of e.g. urinary incontinence.[1,5–8] The literature is, however, not definite in terms of whether these benefits of the minimally invasive approaches can be achieved equally with or without robot support.[2,4,9] It has been argued that robot technology has a particular advantage in obese patients but, again, this has been questioned by a recent study demonstrating similar oncological and pathological outcomes when comparing RALP to LP and OP in obese patients.[10]

In comparison with not using robot support, the use of robot support leads to significantly higher costs due to the capital binding in the robot, maintenance costs and surgical supplies.[4,11,12] However, there could be cost savings in the longer term and in a broader health care sector perspective that outweighs the additional cost of the surgical procedure.

These could flow from the better process outcomes such as less bleeding and fewer bed days. Despite the obvious relevance of a broader perspective, the literature is characterised by focussing solely on admission costs or just operating costs. The overall consequences of the

1  
2  
3 dissemination of the robot technology to health care costs are therefore to a large extent  
4  
5 uncertain. The objective of this study is to estimate the costs attributable to RALP as  
6  
7 compared to OP and LP in a broad health care sector perspective and using a time horizon  
8  
9 that allows for clinical manifestation of the postoperative advantages of robot support.  
10  
11

## 12 13 14 15 16 **2. Patients and methods**

### 17 18 19 20 21 **2.1. Design**

22  
23 A national-scale cohort was followed from one year before to one year after prostatectomy. A  
24  
25 quasi-experimental difference-in-difference design [13] was combined with regression to  
26  
27 adjust for pre-treatment covariates (risk selection into surgical technique) [14]. Data was  
28  
29 collected in connection with a Danish health technology assessment (HTA) of robot-assisted  
30  
31 surgery, which this study is a further development of.[15]  
32  
33

### 34 35 36 **2.2. Study population**

37  
38 Consecutive men who underwent prostatectomy in Denmark in the period January 1<sup>st</sup> 2006 to  
39  
40 august 1<sup>st</sup> 2013 were identified from the National Patient Registry,[16] using the procedural  
41  
42 codes KKEC00, KKEC00A, KKEC00B, KKEC00C, KKEC01, KKEC01A, KKEC01B,  
43  
44 KKEC01C, KZXX00 and ZPW00002. To enhance comparability of the patients an inclusion  
45  
46 criterion was that the robot-assisted technique should be available at the given hospital at the  
47  
48 time of the prostatectomy.  
49  
50  
51  
52  
53  
54  
55  
56  
57  
58  
59  
60



### 2.3. Data sources

Individual-level register data were extracted from national administrative registries including The Danish National Patient Register [16], The Danish Civil Registration System [17], and The Danish National Health Service Register.[18] Costs were drawn from the registries for the diagnosis related grouping system (DRG) and the Danish outpatient grouping system (DAGS).[19]

### 2.4. Costs

A health care sector perspective was applied in this study. Thus the study included service use within the primary sector (general practitioners, medical specialists, therapists and other privately practicing specialists) and within the hospital sector (in- and outpatient hospital-based activity). Primary care service was valued via the activity-based fees and hospital-based care via the DRG/DAGS-tariffs that were used at the time of service provision. The DRG tariffs for prostatectomy cover the activity from the day of admission to the day of discharge (preparation, surgery, remobilisation and discharge) whereas follow-up visits and other events after discharge, e.g. caused by complications, are therefore separately reimbursed. The specific tariffs for prostatectomy are shown in supplementary material Table S1. The higher tariff of the robot-assisted surgery (on average € 4525) thus refers to the rather expensive instrument kit required for each surgery, robot maintenance costs and longer operating time. The theoretical interpretation of the DRG tariff is an average long-term cost. The influence of the lack of person-individual variation in the DRG tariff as a cost estimate for the admission for prostatectomy was informed by conducting sensitivity analysis where the number of bed days was added as a proxy for cost intensity. Other sensitivity analyses included adjustment for experience with robot and patient volume, as well as restrictions to

1  
2  
3 the two most recent years and exclusion of the tariffs from the costs. Costs are reported in  
4  
5 Euros (2014 price year).  
6  
7

#### 9 10 2.5. Identification of relevant aspects of risk selection

11 Characteristics that affect the choice of surgical method were identified in a literature review.  
12  
13 Patient-level characteristics included age, cancer stage and comorbidity and hospital-level  
14  
15 characteristics included organisational structure around the technology such as specialization  
16  
17 of staff. The identified characteristics were defined for the study population based on  
18  
19 information from national registries: age (years), tumour size and nodal involvement based on  
20  
21 the TNM-classification [20], comorbidity as defined by the Charlson Comorbidity Index [21],  
22  
23 geographical region of the treating centre, level of experience by time of surgery (to-date  
24  
25 volume of prostatectomies using the particular technology), and organisational structure of the  
26  
27 surgical department, referring to whether the robot is used within a single department, used  
28  
29 across several departments or used in a robotic center. Finally, dummies for year of surgery  
30  
31 were specified in order to be able to adjust for changes in DRG tariffs over the years.  
32  
33  
34  
35  
36  
37

#### 38 39 2.6. Statistical analysis

40 Summary statistics including Pearson's chi-square tests for categorical variables and ANOVA  
41  
42 for continuous variables were used to describe patient characteristics. All analysis followed a  
43  
44 difference-in-difference (DID) design where the costs attributable to prostatectomy were  
45  
46 estimated as the differences between comparators (OP, LP and RALP) of differences in  
47  
48 resource use and costs between 12-month periods before and after prostatectomy.[13] To  
49  
50 further handle risk selection (as described in the previous section) regression models were  
51  
52 used to adjust the DID-estimates for covariates identified to affect selection into surgical  
53  
54 technique.[14] Regressions were specified as multilevel regressions due to the patient-level  
55  
56  
57  
58  
59  
60

1  
2  
3 being nested in the hospital-level (centres treating more than one patient) in order not to  
4  
5 underestimate standard errors. The validity of regression models was visually inspected based  
6  
7 on conventional regression diagnostic plots and found to be robust.  
8

9  
10 Results are reported as arithmetic means with 95% confidence intervals (CI) based on  
11  
12 bootstrapping with 5000 replicates due to the skewed nature of the data. All tests were two-  
13  
14 sided with a 5% significance level. The statistical analyses were performed in Stata SE 13.1.  
15

### 16 17 18 2.7. Ethics 19

20 The study was conducted in accordance with The Person Data Act and hence was approved  
21  
22 by relevant authorities (The Danish Data Protection Agency) (Journal number 2007-58-0010).  
23  
24 *Consent is not required for register-based studies according the Danish Ethical Committee*  
25  
26 *system.*  
27  
28

## 29 30 31 32 33 3. Results 34

35  
36  
37 Of the 4309 patients included in this study 52% underwent RALP, 42% underwent OP and  
38  
39 6% underwent LP (cf. supplementary Table S2 for procedure volume over time). There were  
40  
41 22 conversions from either RALP or LP to OP, which were categorized according to the  
42  
43 intended technique. The characteristics of the cohort are shown in Table 1. The treatment  
44  
45 groups were clinically similar in age, though the RALP group was younger than the OP and  
46  
47 LP group (median age 64 vs. 65 years) ( $p < 0.001$ ). The choice of surgical technique differed  
48  
49 geographically and with regard to the organisation of the robot technology ( $p < 0.001$ ). Cancer  
50  
51 severity was routinely registered for a proportion of patients only, which could be due to the  
52  
53 fact that nodal involvement and metastases are rarely an issue for prostatectomy-candidates.  
54  
55  
56  
57  
58  
59  
60

1  
2  
3  
4  
5  
6  
7  
8  
9  
10  
11  
12  
13  
14  
15  
16  
17  
18  
19  
20  
21  
22  
23  
24  
25  
26  
27  
28  
29  
30  
31  
32  
33  
34  
35  
36  
37  
38  
39  
40  
41  
42  
43  
44  
45  
46  
47  
48  
49  
50  
51  
52  
53  
54  
55  
56  
57  
58  
59  
60

However, in case of no nodal involvement patients were less likely to have received a minimally invasive technique ( $p \leq 0.001$ ).

For peer review only

**Table 1** - Comparison of descriptive characteristics (n (% of treatment group))

| Feature                                                                                                                                                                                             | RALP<br>(n=2,241) | OP<br>(n=1,818) | LP<br>(n=250) | p value |
|-----------------------------------------------------------------------------------------------------------------------------------------------------------------------------------------------------|-------------------|-----------------|---------------|---------|
| <b>Age</b> (median (25% - 75%quartile))                                                                                                                                                             | 64 (60 - 67)      | 65 (61 - 68)    | 65 (61 - 68)  | <0.001  |
| <b>Region</b>                                                                                                                                                                                       |                   |                 |               | <0.001  |
| Capital Region of Denmark                                                                                                                                                                           | 1,097 (49)        | 1,272 (70)      | 120 (48)      |         |
| Region of Southern Denmark                                                                                                                                                                          | 121 (5)           | 123 (7)         | 12 (5)        |         |
| Central Denmark Region                                                                                                                                                                              | 554 (25)          | 264 (15)        | 77 (31)       |         |
| North Denmark Region                                                                                                                                                                                | 470 (21)          | 160 (9)         | 39 (16)       |         |
| <b>Organisation type*</b>                                                                                                                                                                           |                   |                 |               | <0.001  |
| Within-department                                                                                                                                                                                   | 878 (39)          | 1,009 (55)      | 101 (41)      |         |
| Cross-departments                                                                                                                                                                                   | 470 (21)          | 160 (9)         | 39 (16)       |         |
| Robotic centre                                                                                                                                                                                      | 894 (40)          | 650 (36)        | 108 (44)      |         |
| <b>Tumour size</b>                                                                                                                                                                                  |                   |                 |               | 0.521   |
| T0-T2                                                                                                                                                                                               | 847 (38)          | 649 (36)        | 81 (33)       |         |
| T3-T4                                                                                                                                                                                               | 324 (14)          | 265 (15)        | 37 (15)       |         |
| Ta & Tis                                                                                                                                                                                            | 0 (0)             | 1 (0)           | 0 (0)         |         |
| Missing data                                                                                                                                                                                        | 1071 (48)         | 904 (50)        | 130 (52)      |         |
| <b>Nodal involvement</b>                                                                                                                                                                            |                   |                 |               | <0.001  |
| N0                                                                                                                                                                                                  | 304 (14)          | 489 (27)        | 46 (19)       |         |
| N1-N3                                                                                                                                                                                               | 40 (2)            | 41 (2)          | 3 (1)         |         |
| Missing data                                                                                                                                                                                        | 1898 (85)         | 1289 (71)       | 199 (80)      |         |
| <b>Metastases</b>                                                                                                                                                                                   |                   |                 |               | 0.001   |
| No                                                                                                                                                                                                  | 652 (29)          | 565 (31)        | 46 (19)       |         |
| Yes                                                                                                                                                                                                 | 0 (0)             | 1 (0)           | 0 (0)         |         |
| Missing data                                                                                                                                                                                        | 1590 (71)         | 1253 (69)       | 202 (81)      |         |
| <b>CCI</b>                                                                                                                                                                                          |                   |                 |               | 0.401   |
| 0                                                                                                                                                                                                   | 3 (0)             | 1 (0)           | 0 (0)         |         |
| 1                                                                                                                                                                                                   | 0 (0)             | 1 (0)           | 0 (0)         |         |
| 2                                                                                                                                                                                                   | 2,230 (99)        | 1,810 (100)     | 245 (99)      |         |
| 3                                                                                                                                                                                                   | 4 (0)             | 2 (0)           | 2 (1)         |         |
| 6                                                                                                                                                                                                   | 5 (0)             | 5 (0)           | 1 (0)         |         |
| RALP = Robot-assisted laparoscopic prostatectomy; OP = Open prostatectomy; LP = Laparoscopic prostatectomy; Ta = Tumour without invasion; Tis = Carcinoma in situ; CCI = Charlson comorbidity index |                   |                 |               |         |
| *Organisation type refers to whether the robot is used within a single department, used across several departments or used in a robotic center.                                                     |                   |                 |               |         |

Service use per patient, including length of stay, and the unadjusted mean costs of the patients' health care are depicted in Table 2 and 3, respectively. All treatment groups had statistically significant higher service use in the year following the surgery. No differences were found

when comparing RALP to LP but OP was associated with 2.6 extra bed days and slightly higher primary care service use (0.5 more contacts) compared to RALP. This was, however, not reflected in the costs, as RALP was associated with the highest costs primarily caused by differences in inpatient care (Table 3).

**Table 2** – Health care service use in relation to prostatectomy. Values are mean per patient with 95% CI

|                                                                                                                                                                                                                                                                                       | Primary care<br>Number of<br>contacts | Hospital-based care     |                         |                   |
|---------------------------------------------------------------------------------------------------------------------------------------------------------------------------------------------------------------------------------------------------------------------------------------|---------------------------------------|-------------------------|-------------------------|-------------------|
|                                                                                                                                                                                                                                                                                       |                                       | Outpatient              | Inpatient               |                   |
|                                                                                                                                                                                                                                                                                       |                                       | Number of<br>admissions | Number of<br>admissions | Length of stay    |
| <b>OP</b>                                                                                                                                                                                                                                                                             |                                       |                         |                         |                   |
| Before                                                                                                                                                                                                                                                                                | 11.0                                  | 08.1                    | 00.0                    | 01.0              |
| After                                                                                                                                                                                                                                                                                 | 12.0                                  | 09.1                    | 01.1                    | 06.1              |
| Difference                                                                                                                                                                                                                                                                            | 0.8 (0.5 – 1.0)                       | 1.0 (0.6 – 1.4)         | 1.3 (1.2 – 1.4)         | 5.5 (5.2 – 5.9)   |
| <b>LP</b>                                                                                                                                                                                                                                                                             |                                       |                         |                         |                   |
| Before                                                                                                                                                                                                                                                                                | 10.0                                  | 07.1                    | 00.0                    | 01.0              |
| After                                                                                                                                                                                                                                                                                 | 11.0                                  | 08.1                    | 01.0                    | 04.1              |
| Difference                                                                                                                                                                                                                                                                            | 0.8 (0.1 – 1.5)                       | 0.7 (-0.3 – 1.6)        | 1.1 (1.0 – 1.2)         | 3.6 (2.7 – 4.4)   |
| <b>RALP</b>                                                                                                                                                                                                                                                                           |                                       |                         |                         |                   |
| Before                                                                                                                                                                                                                                                                                | 10.1                                  | 07.1                    | 00.0                    | 00.1              |
| After                                                                                                                                                                                                                                                                                 | 11.0                                  | 09.0                    | 01.1                    | 03.1              |
| Difference                                                                                                                                                                                                                                                                            | 0.3 (0.1 – 0.5)                       | 1.2 (0.8 – 1.5)         | 1.2 (1.1 – 1.2)         | 3.0 (2.7 – 3.3)   |
| <b>Robot attributable service use</b>                                                                                                                                                                                                                                                 |                                       |                         |                         |                   |
| Compared to OP                                                                                                                                                                                                                                                                        | -0.5 (-0.8 – 0.1)                     | 0.2 (-0.4 – 0.7)        | -0.1 (-0.2 – 0.0)       | -2.6 (-3.0 – 2.1) |
| Compared to LP                                                                                                                                                                                                                                                                        | -0.5 (-1.3 – 0.2)                     | 0.5 (-0.5 – 1.5)        | 0.1 (-0.1 – 0.2)        | -0.6 (-1.5 – 0.3) |
| RALP = Robot-assisted laparoscopic prostatectomy; OP = Open prostatectomy; LP = Laparoscopic prostatectomy; CI=confidence interval. Before refers to the 12 months prior to the index surgery and after refers to the 12 months after the index surgery including the day of surgery. |                                       |                         |                         |                   |

**Table 3** – Health care costs in relation to prostatectomy. Values are mean costs (2014-€) per patient with 95% CI

| Costs                                                                                                                                                                                                                                                                                 | Hospital-based care |                    |                       | Total                 |
|---------------------------------------------------------------------------------------------------------------------------------------------------------------------------------------------------------------------------------------------------------------------------------------|---------------------|--------------------|-----------------------|-----------------------|
|                                                                                                                                                                                                                                                                                       | Primary care        | Outpatient         | Inpatient             |                       |
| <b>OP</b>                                                                                                                                                                                                                                                                             |                     |                    |                       |                       |
| Before                                                                                                                                                                                                                                                                                | 442                 | 2720               | 1551                  | 4714                  |
| After                                                                                                                                                                                                                                                                                 | 429                 | 3432               | 11429                 | 15286                 |
| Difference                                                                                                                                                                                                                                                                            | -13 (-29 – 3)       | 712 (493 – 931)    | 9878 (9532 – 10224)   | 10572 (10135 – 11010) |
| <b>LP</b>                                                                                                                                                                                                                                                                             |                     |                    |                       |                       |
| Before                                                                                                                                                                                                                                                                                | 415                 | 2753               | 1271                  | 4440                  |
| After                                                                                                                                                                                                                                                                                 | 416                 | 2584               | 10856                 | 13856                 |
| Difference                                                                                                                                                                                                                                                                            | 0 (-46 – 46)        | -169 (-624 – 285)  | 9585 (8663 – 10507)   | 9416 (8343 – 10489)   |
| <b>RALP</b>                                                                                                                                                                                                                                                                           |                     |                    |                       |                       |
| Before                                                                                                                                                                                                                                                                                | 421                 | 2724               | 1242                  | 4392                  |
| After                                                                                                                                                                                                                                                                                 | 392                 | 2878               | 14700                 | 17978                 |
| Difference                                                                                                                                                                                                                                                                            | -29 (-43 – -15)     | 154 (-18 – 325)    | 13458 (13057 – 13859) | 13586 (13132 – 14041) |
| <b>Robot attributable costs</b>                                                                                                                                                                                                                                                       |                     |                    |                       |                       |
| Compared to OP                                                                                                                                                                                                                                                                        | -16 (-37 – 5)       | -558 (-832 – -284) | 3580 (3054 – 4107)    | 3014 (2380 – 3648)    |
| Compared to LP                                                                                                                                                                                                                                                                        | -29 (-77 – 18)      | 323 (-178 – 823)   | 3873 (2865 – 4882)    | 4170 (2986 – 5354)    |
| RALP = Robot-assisted laparoscopic prostatectomy; OP = Open prostatectomy; LP = Laparoscopic prostatectomy; CI=confidence interval. Before refers to the 12 months prior to the index surgery and after refers to the 12 months after the index surgery including the day of surgery. |                     |                    |                       |                       |

1  
2  
3 Figure 1 illustrates the cost patterns over time. The process of getting referred by the general  
4 practitioner to the hospital for diagnosis and later treatment seems to be reflected as a rise of  
5 costs in the primary care sector, is followed by a rise in outpatient care and later in inpatient  
6 care at the time of the prostatectomy. Outpatient follow-up is clearly evident but is not set at a  
7 fixed time. No clear differences stood out except for higher inpatient costs of RALP at the  
8 time of the index prostatectomy. Both in the year prior to and after the prostatectomies  
9 included in this study the patterns are rather similar especially for OP and RALP while LP  
10 fluctuates more due to fewer patients having received this surgical technique.

11  
12 Table 4 illustrates DID-estimates similar to those of table 3 except that multivariate modelling  
13 is used to adjust for eventual residual risk selection not handled by the DID-analytical  
14 strategy. Results support the unadjusted results as significant differences are revealed when  
15 RALP is held against OP and LP respectively. The adjusted costs attributable to RALP varied  
16 as RALP was associated with an extra € 3860 (95% CI 559 – 7160) when held against LP and  
17 € 2459 (95% CI 1377 – 3540) when compared to OP.

18  
19 Costs were significantly higher when patients were operated in Region of Southern Denmark  
20 or North Denmark Region ( $p < 0.05$ ), and when they were operated in hospitals with a robotic  
21 centre ( $p < 0.05$ ).

22  
23 An extended model was applied to assess the role of informative missings on cancer severity.  
24 Adding cancer severity to the model did not substantially affect the cost attributable to RALP.  
25 Tumours categorized as T3-T4 were associated with significant additional costs for all  
26 surgical techniques and having missing data with respect to nodal involvement was associated  
27 with decreased costs but there was no significant interaction between either tumour size or  
28 nodal involvement and surgical technique.



1  
2  
3 Restricting the main model to activity during the two most recent years (2012 and 2013) does  
4  
5 not significantly alter the findings (the average attributable costs increases from € 2459 to €  
6  
7 3889 compared with OP and reduces from € 3860 to € 3359 compared with LP).  
8

9  
10 In order to directly analyse the contribution of the index admission versus the after-period for  
11  
12 the costs attributable to RALP, sensitivity analyses restricting the costs to the after-period  
13  
14 alone show comparable after-periods for LP and RALP whereas the after-period for OP is  
15  
16 characterised by significantly more activity (€ 2332 (95% CI 1287 – 2777)).  
17  
18  
19  
20  
21  
22  
23  
24  
25  
26  
27  
28  
29  
30  
31  
32  
33  
34  
35  
36  
37  
38  
39  
40  
41  
42  
43  
44  
45  
46  
47  
48  
49  
50  
51  
52  
53  
54  
55  
56  
57  
58  
59  
60

**Table 4** – Adjusted estimates of the costs attributable to RALP: Main model compared to extended model, which includes adjustment for tumour size and nodal involvement. Values are mean costs (2014-€) with 95% CI.

| Feature                                                                                                                            | Main model            |         | Extended model        |         |
|------------------------------------------------------------------------------------------------------------------------------------|-----------------------|---------|-----------------------|---------|
|                                                                                                                                    | Coefficient           | p value | Coefficient           | p value |
| <b>Treatment</b>                                                                                                                   |                       |         |                       |         |
| RALP (reference)                                                                                                                   |                       |         |                       |         |
| OP                                                                                                                                 | -2459 (-3540 – -1377) | 0.003   | -2756 (-3965 – -1548) | 0.003   |
| LP                                                                                                                                 | -3860 (-7160 – -559)  | 0.031   | -3990 (-7073 – -906)  | 0.023   |
| <b>Age</b>                                                                                                                         |                       |         |                       |         |
|                                                                                                                                    | 14 (-43 – 71)         | 0.541   | 7 (-66 – 80)          | 0.815   |
| <b>Region</b>                                                                                                                      |                       |         |                       |         |
| Central Denmark Region (reference)                                                                                                 |                       |         |                       |         |
| Capital Region of Denmark                                                                                                          | 85 (-689 – 860)       | 0.775   | 881 (-833 – 2594)     | 0.227   |
| Region of Southern Denmark                                                                                                         | 1907 (610 – 3204)     | 0.015   | 1882 (-13 – 3777)     | 0.051   |
| North Denmark Region                                                                                                               | 241 (156 – 327)       | 0.001   | 404 (-288 – 1096)     | 0.181   |
| <b>Organisation type</b>                                                                                                           |                       |         |                       |         |
| Within-speciality (reference)                                                                                                      |                       |         |                       |         |
| Robotic centre                                                                                                                     | 1028 (460 – 1595)     | 0.007   | 978 (-181 – 2136)     | 0.079   |
| <b>Year of surgery</b>                                                                                                             |                       |         |                       |         |
| 2006 (reference)                                                                                                                   |                       |         |                       |         |
| 2007                                                                                                                               | 376 (-264 – 1016)     | 0.178   | 304 (-253 – 861)      | 0.204   |
| 2008                                                                                                                               | 1386 (-41 – 2813)     | 0.054   | 1222 (-51 – 2496)     | 0.056   |
| 2009                                                                                                                               | -688 (-1627 – 250)    | 0.111   | -919 (-1870 – 32)     | 0.055   |
| 2010                                                                                                                               | 910 (-540 – 2361)     | 0.156   | 668 (-734 – 2070)     | 0.257   |
| 2011                                                                                                                               | 1244 (-226 – 2714)    | 0.079   | 971 (-552 – 2494)     | 0.151   |
| 2012                                                                                                                               | 1423 (205 – 2641)     | 0.032   | 1371 (433 – 2309)     | 0.015   |
| 2013                                                                                                                               | 3036 (1338 – 4734)    | 0.008   | 3058 (1591 – 4525)    | 0.004   |
| <b>Tumour size</b>                                                                                                                 |                       |         |                       |         |
| T0-T2 (reference)                                                                                                                  |                       |         |                       |         |
| T3-T4                                                                                                                              |                       |         | 1172 (683 – 1660)     | 0.003   |
| Missing data                                                                                                                       |                       |         | 1599 (-1270 – 4469)   | 0.197   |
| <b>Nodal involvement</b>                                                                                                           |                       |         |                       |         |
| N0 (reference)                                                                                                                     |                       |         |                       |         |
| N1-N3                                                                                                                              |                       |         | -2676 (-5796 – 444)   | 0.076   |
| Missing data                                                                                                                       |                       |         | -1219 (-2102 – -335)  | 0.019   |
| <b>Constant</b>                                                                                                                    |                       |         |                       |         |
|                                                                                                                                    | 10803 (7643 – 13964)  | 0.001   | 11136 (7111 – 15161)  | 0.002   |
| n                                                                                                                                  |                       | 4309    |                       | 4309    |
| R <sup>2</sup>                                                                                                                     |                       | 0.041   |                       | 0.046   |
| Root mean standard error                                                                                                           |                       | 10232   |                       | 10213   |
| RALP = Robot-assisted laparoscopic prostatectomy; OP = Open prostatectomy; LP = Laparoscopic prostatectomy; CI=confidence interval |                       |         |                       |         |

#### 4. Discussion

1  
2  
3  
4  
5  
6  
7  
8  
9  
10  
11  
12  
13  
14  
15  
16  
17  
18  
19  
20  
21  
22  
23  
24  
25  
26  
27  
28  
29  
30  
31  
32  
33  
34  
35  
36  
37  
38  
39  
40  
41  
42  
43  
44  
45  
46  
47  
48  
49  
50  
51  
52  
53  
54  
55  
56  
57  
58  
59  
60

Practically all prostatectomies performed in Danish hospitals over a period of eight years were included in this analysis, which focussed on the broad health care sector consequences of using robot technology. The cost of RALP was found to be higher than the costs of both OP and LP due to the difference in DRG tariffs across these surgical techniques. No evidence was found of RALP impacting service use when compared to LP, however, some reduction in bed days in the after-period was found when compared to OP. Hence, the main contribution of this study is an important piece of evidence that, when considering a broad health care sector perspective and a longer time horizon than the index admission, the use of RALP does not seem to generate cost consequences that can outweigh the additional cost associated with the index surgery.

A recent study by Hughes et al. estimated the resource use in the postoperative phase after prostatectomy in a hospital perspective and found that RALP led to costs savings, when the cost of the index surgery was excluded from the equation.[22] This study is in many ways similar to the present in that it is based on a large sample and considers extra-index-surgery consequences of using robot technology. It has however a couple of weaknesses that is circumvented in the present study. First, it includes patients who were referred to centres not offering robot technology and who could have different profiles than those referred to centres offering robot technology. Second, the investigators did not analytically handle the fact that patients were selected into surgical technique. It thus remains unclear whether the difference between the present results of no cost saving and Hughes et al.s' finding of a cost saving is due to these weaknesses or whether they are simply do to differences between the British and the Danish context.

1  
2  
3 Previous studies have assessed the costs of robot technology in an analytical perspective  
4  
5 restricted to hospital costs of the index surgery. Kim et al. found that RALP, despite shorter  
6  
7 hospital stays, was associated with higher operation costs than OP by an average that more or  
8  
9 less corresponds to the difference in Danish DRG tariffs between surgical techniques (mean  
10  
11 \$11932 vs. \$9390;  $p < 0.001$ ).[23] Similarly, Bolenz et al. found hospital costs to be higher  
12  
13 for RALP compared to LP and OP, which was a bit lower but still within the level of the  
14  
15 difference in the Danish DRG tariffs (median \$6752 for RALP, \$5687 LP and \$4437 for OP;  
16  
17  $p < 0.001$ ).[12] These studies were conducted in the United States that is not normally  
18  
19 considered to be comparable as a setting due to different system structures and price levels.  
20  
21 The strengths of this study relates to the design where a cohort of consecutive patients are  
22  
23 observed and where appropriate analytical effort is made into handling selection for surgical  
24  
25 techniques. The hybrid DID-design in combination with regression-based adjustment for pre-  
26  
27 treatment covariates serves to minimize the effect of selection bias, which can be an important  
28  
29 issue in observational designs that may have been chosen as the only option or in priority of  
30  
31 external validity. This design has the ability to cleanse out exogenous factors such as time and  
32  
33 to isolate the costs related to the prostatectomy from the costs related to e.g. chronic  
34  
35 comorbidities or other time invariant patient characteristics.[24] The design is particularly  
36  
37 powerful when combined with extra means for handling selection and multilevel multivariate  
38  
39 regression was here used to adjust for hospital-level characteristics as well as patient-level  
40  
41 characteristics that could have caused confounding. It should also be mentioned that, we were  
42  
43 able to validate the consecutiveness of data and the coding of surgical techniques by  
44  
45 comparing register data to the independent clinical database UroLap, which supported that  
46  
47 data were truly representing consecutive patients and which gave no reason to suspect  
48  
49 misclassification.[25]  
50  
51  
52  
53  
54  
55  
56  
57  
58  
59  
60

1  
2  
3 In the early stages of this work we suspected that the cost implications of robot technology  
4 would be affected by centre volume and experience with the technology. We thus included  
5 variables in the regression model for these organisational-level covariates but they appeared  
6 to be insignificant contributors and were thus excluded from the reported main model. Also,  
7 we sought to assess whether there was any effect modification from point at the learning  
8 curve by including interaction terms between the dummies of year of surgery and the cost  
9 consequences of robot technology but again, these turned out to be insignificant and were thus  
10 left out in the main model. The geographical variations found could reflect patient  
11 heterogeneity caused by both cultural and structural variations such as different waiting times  
12 and referral practice.  
13  
14  
15  
16  
17  
18  
19  
20  
21  
22  
23  
24  
25  
26

27 The main weakness of this study lies in the premises of basing it on registry data, where  
28 severity and other clinical details are not routinely recorded. One variable of relevance to  
29 choice of surgical technique would be body mass index (BMI).[26] Another weakness  
30 concerns the missing values on cancer stage, as it appeared that doctors are not routinely  
31 registering TNM status in relation to prostatectomy. Tumour size was registered for about  
32 50% of patients while nodal involvement and metastasis were registered for around 25% of  
33 patients only. Whether this reflects irrelevance of registration in relation to the choice of  
34 surgical technique and expected outcome or other reasons is unclear but conducting parallel  
35 analysis with and without TNM status did not substantially affect results. And more  
36 importantly, patients with missing values on the TNM status did not seem to be different from  
37 patients with complete data. A number of sensitivity analyses were undertaken to address  
38 limitations of the study. First, the use of national tariffs as an expression for the patient-level  
39 cost of hospital service ignores patient- and hospital level variation. E.g. differences in  
40 coefficient of utilization are not reflected in the tariffs. A sensitivity analysis where the  
41  
42  
43  
44  
45  
46  
47  
48  
49  
50  
51  
52  
53  
54  
55  
56  
57  
58  
59  
60

1  
2  
3 number of bed days was included in the model was therefore undertaken and confirmed that  
4  
5 variation captured in bed days had no influence on the main result. This analysis is however  
6  
7 no full compensation for the lack of patient-level variation and this limits the interpretation of  
8  
9 the analysis to the broad-sector consequences of using robot technology as opposed to the  
10  
11 technical efficiency or productivity that characterises the operation of the robot technology.  
12  
13 Also it should be noted that time dummies were included in the base-case model in order to  
14  
15 take out variation that was due to changes in the DRG tariffs over time. If centres in the future  
16  
17 administer the robot technology (and other surgical techniques for that sake) in a more or less  
18  
19 efficient way, e.g. by operating more patients per robot this will affect the cost of index  
20  
21 surgery (and should lead to an adjustment of the DRG tariff) whereas the main focus of this  
22  
23 analysis, the broader-sector cost consequences, should be unaffected if the quality level is  
24  
25 kept.  
26  
27

28  
29 Further research seems warranted as RALP is here found to be overall more costly than its  
30  
31 alternatives while there appears to be limited evidence for a clinical benefit to the patients. At  
32  
33 best, a randomised controlled trial comparing RALP to both LP and OP should be conducted  
34  
35 and followed by a cost effectiveness evaluation. LP is a relatively rare choice of surgical  
36  
37 approach in Denmark although it has been found to create health- and functional outcomes  
38  
39 comparable to those of RALP.[3,9,27] However, there is evidence that RALP is a superior  
40  
41 choice with regards to the risk of erectile dysfunction.[28] If this was also the case in the  
42  
43 present cohort it was not reflected in the number of visits to neither hospitals nor the primary  
44  
45 health care sector.  
46  
47  
48  
49  
50  
51  
52  
53  
54  
55  
56  
57  
58  
59  
60

## 5. Conclusions

In this study from the Danish context, the use of RALP generates a factor 1.3 additional cost when compared with OP and a factor 1.6 additional cost when compared with LP, on average, based on 12 months follow-up. The policy interpretation is that the use of robots for prostatectomy should be driven by clinical superiority and that formal effectiveness analysis is required to determine whether the current and eventual new purchasing of robot capacity is best used for prostatectomy.

## 6. Acknowledgements

We would like to thank Line Stjernholm Tipsmark (LST) for assistance in requisitioning data and for performing preliminary analyses.

## 7. Conflicts of Interest statement

Vibe Bolvig Hyldgård: None

Karin Rosenkilde Laursen: None

Johan Poulsen: None

Rikke Søgaard: None

## 8. Funding

This research received no specific grant from any funding agency in the public, commercial or not-for-profit sectors

## 9. Data sharing statement

Unfortunately no additional data are available

## 10. Contributors

Drafting the manuscript: VBH. Analysis and interpretation: VBH+RS. Statistical analysis: VBH+KRL. Concept and design: JP+RS. Acquisition of data: RS+KRL+LST. Critical revision of manuscript: JP+RS+KRL+VBH. Supervision: RS.



## References

1. De Carlo F, Celestino F, Verri C, Masedu F, Liberati E, Di Stasi SM. Retropubic, Laparoscopic, and Robot-Assisted Radical Prostatectomy: Surgical, Oncological, and Functional Outcomes: A Systematic Review. *Urol. Int.* 2014;93:373–83.
2. Ficarra V, Novara G, Artibani W, Cestari A, Galfano A, Graefen M, et al. Retropubic, Laparoscopic, and Robot-Assisted Radical Prostatectomy: A Systematic Review and Cumulative Analysis of Comparative Studies. *Eur. Urol.* 2009;55:1037–63.
3. Close A, Robertson C, Rushton S, Shirley M, Vale L, Ramsay C, et al. Comparative cost-effectiveness of robot-assisted and standard laparoscopic prostatectomy as alternatives to open radical prostatectomy for treatment of men with localised prostate cancer: a health technology assessment from the perspective of the UK Natio. *Eur. Urol. European Association of Urology*; 2013;64:361–9.
4. Bolenz C, Freedland SJ, Hollenbeck BK, Lotan Y, Lowrance WT, Nelson JB, et al. Costs of radical prostatectomy for prostate cancer: a systematic review. *Eur. Urol. European Association of Urology*; 2012;65:316–24.
5. Trinh Q-D, Sammon J, Sun M, Ravi P, Ghani KR, Bianchi M, et al. Perioperative Outcomes of Robot-Assisted Radical Prostatectomy Compared With Open Radical Prostatectomy: Results From the Nationwide Inpatient Sample. *Eur. Urol.* 2012;61:679–85.
6. Carlsson S, Nilsson AE, Schumacher MC, Jonsson MN, Volz DS, Steineck G, et al. Surgery-related complications in 1253 robot-assisted and 485 open retropubic radical prostatectomies at the Karolinska University Hospital, Sweden. *Urology. Elsevier Inc.*; 2010;75:1092–7.
7. Davis JW, Kreaden US, Gabbert J, Thomas R. Learning curve assessment of robot-assisted radical prostatectomy compared with open-surgery controls from the premier perspective

1  
2  
3 database. *J. Endourol.* 2014;28:560–6.  
4

5  
6 8. Hofer MD, Meeks JJ, Cashy J, Kundu S, Zhao LC. Impact of increasing prevalence of  
7  
8 minimally invasive prostatectomy on open prostatectomy observed in the national inpatient  
9  
10 sample and national surgical quality improvement program. *J. Endourol.* 2013;27:102–7.  
11

12  
13 9. Berge V, Berg RE, Hoff JR, Wessel N, Diep LM, Karlsen SJ, et al. A Prospective Study of  
14  
15 Transition From Laparoscopic to Robot-assisted Radical Prostatectomy: Quality of Life  
16  
17 Outcomes After 36-Month Follow-up. *Urology.* Elsevier Inc.; 2013;81:781–6.  
18

19  
20 10. Busch J, Gonzalzo ML, Leva N, Ferrari M, Cash H, Kempkensteffen C, et al. Matched  
21  
22 comparison of robot-assisted, laparoscopic and open radical prostatectomy regarding  
23  
24 pathologic and oncologic outcomes in obese patients. *World J. Urol.* 2014;397–402.  
25

26  
27 11. Hohwü L, Borre M, Ehlers L, Venborg Pedersen K. A short-term cost-effectiveness study  
28  
29 comparing robot-assisted laparoscopic and open retropubic radical prostatectomy. *J. Med.*  
30  
31 *Econ.* 2011;14:403–9.  
32

33  
34 12. Bolenz C, Gupta A, Hotze T, Ho R, Cadeddu J a, Roehrborn CG, et al. Cost comparison  
35  
36 of robotic, laparoscopic, and open radical prostatectomy for prostate cancer. *Eur. Urol.*  
37  
38 2010;57:453–8.  
39

40  
41 13. Dimick JB, Ryan AM. Methods for evaluating changes in health care policy: the  
42  
43 difference-in-differences approach. *JAMA.* 2014;312:2401–2.  
44

45  
46 14. Abadie A. Semiparametric Difference-in-Differences Estimators. *Rev. Econ. Stud.*  
47  
48 2005;72:1–19.  
49

50  
51 15. CFK · Folkesundhed & Kvalitetsudvikling Region Midtjylland. Medicinsk  
52  
53 teknologivurdering af robotassisteret kirurgi (HTA of robot-assisted surgery). Aarhus; 2015.  
54  
55

56  
57 16. Lynge E, Sandegaard JL, Rebolj M. The Danish National Patient Register. *Scand. J.*  
58  
59  
60

1  
2  
3 Public Health. 2011;39:30–3.  
4

5  
6 17. CPR-Kontoret. Udtræksvejledning for offentlige brugere. Version 10 Denmark; 2015 p.  
7  
8 1–98.  
9

10  
11 18. Andersen JS, Olivarius NDF, Krasnik A. The Danish National Health Service Register.  
12  
13 Scand. J. Public Health. 2011;39:34–7.  
14

15  
16 19. Sundhedsstyrelsen. Takstberegning for sygehusene. Version 2.0 Copenhagen; 2009 p. 12.  
17

18  
19 20. NIH National Cancer Institute. Cancer Staging [Internet]. [cited 2015 Oct 2]. p. Cancer  
20  
21 staging. Available from: <http://www.cancer.gov/about-cancer/diagnosis->  
22  
23 [staging/staging/staging-fact-sheet](http://www.cancer.gov/about-cancer/diagnosis-staging/staging/staging-fact-sheet)  
24

25  
26 21. Charlson ME, Pompei P, Ales KL, MacKenzie CR. A new method of classifying  
27  
28 prognostic comorbidity in longitudinal studies: development and validation. J. Chronic Dis.  
29  
30 1987;40:373–83.  
31

32  
33 22. Hughes D, Camp C, O’Hara J, Adshead J. Health resource use following robot-assisted  
34  
35 surgery versus open and conventional laparoscopic techniques in oncology: Analysis of  
36  
37 English secondary care data for radical prostatectomy and partial nephrectomy. BJU Int.  
38  
39 2016;  
40

41  
42 23. Kim SP, Shah ND, Karnes RJ, Weight CJ, Shippee ND, Han LC, et al. Hospitalization  
43  
44 costs for radical prostatectomy attributable to robotic surgery. Eur. Urol. 2013;64:11–6.  
45  
46

47  
48 24. Imbens G, Wooldridge J. Recent developments in the econometrics of program evaluation.  
49  
50 J. Econ. Lit. 2009;47:5–86.  
51

52  
53 25. Dansk Urologisk Selskab. UroLap. Årsrapport 2013. København; 2014.  
54

55  
56 26. Ramsay C, Pickard R, Robertson C, Close a, Vale L, Armstrong N, et al. Systematic  
57  
58 review and economic modelling of the relative clinical benefit and cost-effectiveness of  
59  
60

1  
2  
3 laparoscopic surgery and robotic surgery for removal of the prostate in men with localised  
4  
5 prostate cancer. Health Technol. Assess. 2012 Jan.

6  
7  
8 27. Kasraeian A, Barret E, Chan J, Sanchez-Salas R, Validire P, Cathelineau X, et al.

9  
10 Comparison of the rate, location and size of positive surgical margins after laparoscopic and  
11  
12 robot-assisted laparoscopic radical prostatectomy. BJU Int. 2011;108:1174–8.

13  
14  
15 28. Asimakopoulos AD, Pereira Fraga CT, Annino F, Pasqualetti P, Calado A a., Mugnier C.

16  
17 Randomized comparison between laparoscopic and robot-assisted nerve-sparing radical  
18  
19 prostatectomy. J. Sex. Med. 2011;8:1503–12.  
20  
21  
22  
23  
24  
25  
26  
27  
28  
29  
30  
31  
32  
33  
34  
35

36 **Figure legends:**

37  
38  
39 **Figure 1** – Time series graphics for the unadjusted mean costs (€). Month zero marks the time  
40 of prostatectomy, price year 2014.

41 RALP = Robot-assisted laparoscopic prostatectomy; OP = Open prostatectomy; LP =  
42 Laparoscopic prostatectomy  
43  
44  
45  
46  
47  
48  
49  
50  
51  
52  
53  
54  
55  
56  
57  
58  
59  
60

## Supplementary material

**Table S1** - DRG tariffs for prostatectomy over the study period (2014-€)

| Year of operation      | DRG tariff |           | Difference |
|------------------------|------------|-----------|------------|
|                        | RALP       | OP and LP |            |
| 2006                   | 13666      | 10746     | 2920       |
| 2007                   | 13291      | 10260     | 3031       |
| 2008                   | 13218      | 10101     | 3118       |
| 2009                   | 11397      | 8087      | 3310       |
| 2010                   | 13082      | 7751      | 5331       |
| 2011                   | 13362      | 8316      | 5046       |
| 2012                   | 13547      | 8732      | 4815       |
| 2013                   | 14250      | 8779      | 5471       |
| Volume-weighted tariff | 13275      | 8750      | 4525       |

RALP = Robot-assisted laparoscopic prostatectomy; OP = Open prostatectomy; LP = Laparoscopic prostatectomy; CI=confidence interval.  
The volume-weighted tariff is calculated as an average tariff for the prostatectomy cohort. The tariffs show large variation over the years, which is due to regular adjustment in order not to introduce profit and thus incentivize the use of one technique over another.

**Table S2** - Procedure volume over the study period

| Year of operation | RALP | OP   | LP  | Total |
|-------------------|------|------|-----|-------|
| 2006              | 3    | 65   | 25  | 93    |
| 2007              | 42   | 68   | 8   | 118   |
| 2008              | 78   | 314  | 47  | 439   |
| 2009              | 289  | 447  | 33  | 769   |
| 2010              | 340  | 317  | 31  | 688   |
| 2011              | 462  | 229  | 29  | 720   |
| 2012              | 613  | 294  | 59  | 966   |
| 2013              | 415  | 85   | 16  | 516   |
| Total             | 2242 | 1819 | 248 | 4309  |

RALP = Robot-assisted laparoscopic prostatectomy; OP = Open prostatectomy; LP = Laparoscopic prostatectomy; CI=confidence interval

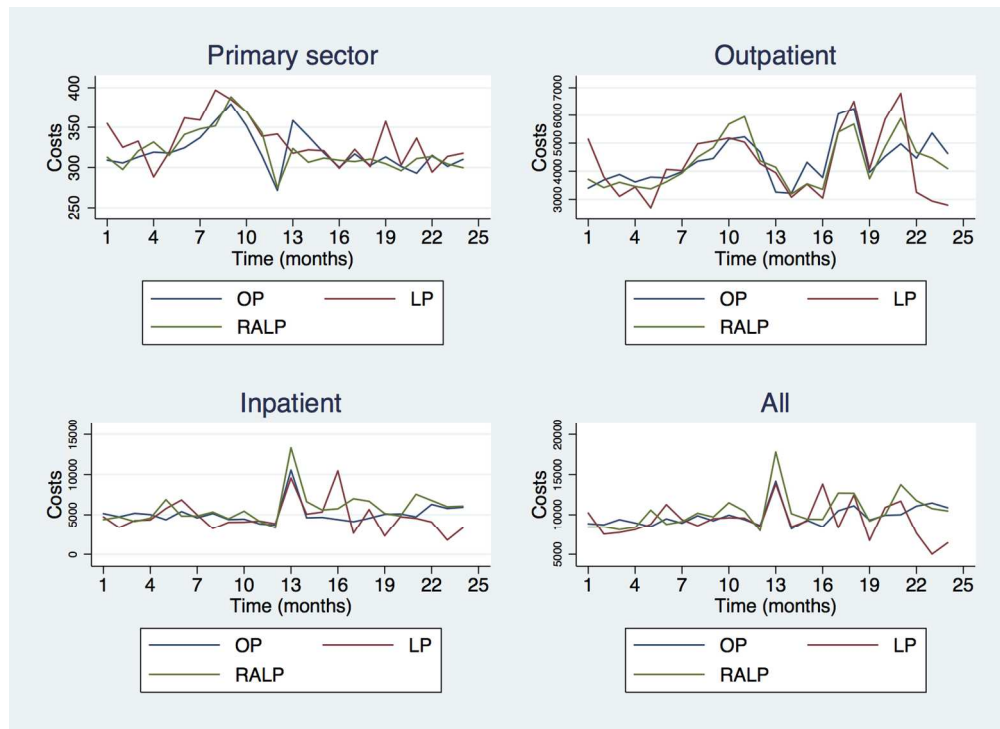

Figure 1 – Time series graphics for the unadjusted mean costs (€). Month zero marks the time of prostatectomy, price year 2014.  
RALP = Robot-assisted laparoscopic prostatectomy; OP = Open prostatectomy; LP = Laparoscopic prostatectomy

139x101mm (300 x 300 DPI)

STROBE 2007 (v4) Statement—Checklist of items that should be included in reports of *cohort studies*

| Section/Topic                | Item # | Recommendation                                                                                                                                                                       | Reported on page # |
|------------------------------|--------|--------------------------------------------------------------------------------------------------------------------------------------------------------------------------------------|--------------------|
| Title and abstract           | 1      | (a) Indicate the study's design with a commonly used term in the title or the abstract                                                                                               | 1+2                |
|                              |        | (b) Provide in the abstract an informative and balanced summary of what was done and what was found                                                                                  | 2                  |
| <b>Introduction</b>          |        |                                                                                                                                                                                      |                    |
| Background/rationale         | 2      | Explain the scientific background and rationale for the investigation being reported                                                                                                 | 4 - 5              |
| Objectives                   | 3      | State specific objectives, including any prespecified hypotheses                                                                                                                     | 5                  |
| <b>Methods</b>               |        |                                                                                                                                                                                      |                    |
| Study design                 | 4      | Present key elements of study design early in the paper                                                                                                                              | 5                  |
| Setting                      | 5      | Describe the setting, locations, and relevant dates, including periods of recruitment, exposure, follow-up, and data collection                                                      | 5 - 6              |
| Participants                 | 6      | (a) Give the eligibility criteria, and the sources and methods of selection of participants. Describe methods of follow-up                                                           | 5 - 6              |
|                              |        | (b) For matched studies, give matching criteria and number of exposed and unexposed                                                                                                  | Na                 |
| Variables                    | 7      | Clearly define all outcomes, exposures, predictors, potential confounders, and effect modifiers. Give diagnostic criteria, if applicable                                             | 6 - 7              |
| Data sources/<br>measurement | 8*     | For each variable of interest, give sources of data and details of methods of assessment (measurement). Describe comparability of assessment methods if there is more than one group | 6 - 7              |
| Bias                         | 9      | Describe any efforts to address potential sources of bias                                                                                                                            | 5 + 7 - 8          |
| Study size                   | 10     | Explain how the study size was arrived at                                                                                                                                            | 5                  |
| Quantitative variables       | 11     | Explain how quantitative variables were handled in the analyses. If applicable, describe which groupings were chosen and why                                                         | 7 - 8              |
| Statistical methods          | 12     | (a) Describe all statistical methods, including those used to control for confounding                                                                                                | 7 - 8              |
|                              |        | (b) Describe any methods used to examine subgroups and interactions                                                                                                                  | 13                 |
|                              |        | (c) Explain how missing data were addressed                                                                                                                                          | 13                 |
|                              |        | (d) If applicable, explain how loss to follow-up was addressed                                                                                                                       | Na                 |
|                              |        | (e) Describe any sensitivity analyses                                                                                                                                                | 6 - 7              |
| <b>Results</b>               |        |                                                                                                                                                                                      |                    |

|                          |     |                                                                                                                                                                                                              |                                 |
|--------------------------|-----|--------------------------------------------------------------------------------------------------------------------------------------------------------------------------------------------------------------|---------------------------------|
| Participants             | 13* | (a) Report numbers of individuals at each stage of study—eg numbers potentially eligible, examined for eligibility, confirmed eligible, included in the study, completing follow-up, and analysed            | 8                               |
|                          |     | (b) Give reasons for non-participation at each stage                                                                                                                                                         | Na                              |
|                          |     | (c) Consider use of a flow diagram                                                                                                                                                                           | Na                              |
| Descriptive data         | 14* | (a) Give characteristics of study participants (eg demographic, clinical, social) and information on exposures and potential confounders                                                                     | 8 – 10                          |
|                          |     | (b) Indicate number of participants with missing data for each variable of interest                                                                                                                          | 10                              |
|                          |     | (c) Summarise follow-up time (eg, average and total amount)                                                                                                                                                  | Na (12 months for all patients) |
| Outcome data             | 15* | Report numbers of outcome events or summary measures over time                                                                                                                                               | Na                              |
| Main results             | 16  | (a) Give unadjusted estimates and, if applicable, confounder-adjusted estimates and their precision (eg, 95% confidence interval). Make clear which confounders were adjusted for and why they were included | 11 – 12                         |
|                          |     | (b) Report category boundaries when continuous variables were categorized                                                                                                                                    | Na                              |
|                          |     | (c) If relevant, consider translating estimates of relative risk into absolute risk for a meaningful time period                                                                                             | Na                              |
| Other analyses           | 17  | Report other analyses done—eg analyses of subgroups and interactions, and sensitivity analyses                                                                                                               | 13 – 14                         |
| <b>Discussion</b>        |     |                                                                                                                                                                                                              |                                 |
| Key results              | 18  | Summarise key results with reference to study objectives                                                                                                                                                     | 16                              |
| <b>Limitations</b>       |     |                                                                                                                                                                                                              |                                 |
| Interpretation           | 20  | Give a cautious overall interpretation of results considering objectives, limitations, multiplicity of analyses, results from similar studies, and other relevant evidence                                   | 16 – 19                         |
| Generalisability         | 21  | Discuss the generalisability (external validity) of the study results                                                                                                                                        | 16 – 19                         |
| <b>Other information</b> |     |                                                                                                                                                                                                              |                                 |
| Funding                  | 22  | Give the source of funding and the role of the funders for the present study and, if applicable, for the original study on which the present article is based                                                | 21                              |

\*Give information separately for cases and controls in case-control studies and, if applicable, for exposed and unexposed groups in cohort and cross-sectional studies.

**Note:** An Explanation and Elaboration article discusses each checklist item and gives methodological background and published examples of transparent reporting. The STROBE checklist is best used in conjunction with this article (freely available on the Web sites of PLoS Medicine at <http://www.plosmedicine.org/>, Annals of Internal Medicine at <http://www.annals.org/>, and Epidemiology at <http://www.epidem.com/>). Information on the STROBE Initiative is available at [www.strobe-statement.org](http://www.strobe-statement.org).
